1 **Quantitative firing pattern phenotyping of hippocampal neuron types**

2 **Abbreviated title:** Firing patterns of hippocampal neuron types

3 Alexander O. Komendantov, Siva Venkadesh, Christopher L. Rees, Diek W. Wheeler,  
4 David J. Hamilton, Giorgio A. Ascoli

5 Krasnow Institute for Advanced Study, George Mason University, 4400 University Drive,  
6 MS 2A1, Fairfax, Virginia 2230

7 **Corresponding authors:** Alexander O. Komendantov (akomenda@gmu.edu),

8 Giorgio A. Ascoli (ascoli@gmu.edu), Krasnow Institute for Advanced Study, George  
9 Mason University, 4400 University Drive, MS 2A1, Fairfax, Virginia 2230

10 Number of pages: 72

11 Number of figures: 8; number of tables: 5 (including 1 color table and 1 box)

12 Number of multimedia: 0; number of 3D models: 0

13 Number of words in Abstract: 250; Number of words in Introduction: 648

14 Number of words in Discussion: 1452

15 **Acknowledgements**

16 This work was supported by grants from the National Institutes of Health (NS39600) and  
17 the National Science Foundation (IIS-1302256). We thank Charise M. White and Keivan  
18 Moradi for useful discussions and Amar Gawade for help with the web portal. The  
19 authors declare no competing financial interests.

## 20 **Abstract**

21           Systematically organizing the anatomical, molecular, and physiological properties  
22 of cortical neurons is important for understanding their computational functions.  
23 Hippocampome.org defines 122 neuron types in the rodent hippocampal formation  
24 (dentate gyrus, CA3, CA2, CA1, subiculum, and entorhinal cortex) based on their somatic,  
25 axonal, and dendritic locations, putative excitatory/inhibitory outputs, molecular marker  
26 expression, and biophysical properties such as time constant and input resistance. Here  
27 we augment the electrophysiological data of this knowledge base by collecting,  
28 quantifying, and analyzing the firing responses to depolarizing current injections for every  
29 hippocampal neuron type from available published experiments. We designed and  
30 implemented objective protocols to classify firing patterns based on both transient and  
31 steady-state activity. Specifically, we identified 5 transients (delay, adapting spiking,  
32 rapidly adapting spiking, transient stuttering, and transient slow-wave bursting) and 4  
33 steady states (non-adapting spiking, persistent stuttering, persistent slow-wave bursting,  
34 and silence). By characterizing the set of all firing responses reported for hippocampal  
35 neurons, this automated classification approach revealed 9 unique families of firing  
36 pattern phenotypes while distinguishing potential new neuronal subtypes. Several novel  
37 statistical associations also emerged between firing responses and other  
38 electrophysiological properties, morphological features, and molecular marker  
39 expression. The firing pattern parameters, complete experimental conditions (including  
40 solution and stimulus details), digitized spike times, exact reference to the original  
41 empirical evidence, and analysis scripts are released open-source through  
42 Hippocampome.org for all neuron types, greatly enhancing the existing search and

43 browse capabilities. This information, collated online in human- and machine-accessible  
44 form, will help design and interpret both experiments and hippocampal model simulations.

45

## 46 **Significance Statement**

47         Comprehensive characterization of nerve cells is essential for understanding  
48 signal processing in biological neuronal networks. Firing patterns are important  
49 identification characteristics of neurons and play crucial roles in information coding in  
50 neural systems. Building upon the comprehensive knowledge base Hippocampome.org,  
51 we developed and implemented automated protocols to classify all known firing  
52 responses exhibited by each neuron type of the rodent hippocampus based on analysis  
53 of transient and steady-state activity. This approach identified the most distinguishing  
54 elements of every firing phenotype and revealed previously unnoticed statistical  
55 associations of firing responses with other electrophysiological, morphological, and  
56 molecular properties. The resulting data, freely released online, constitute a powerful  
57 resource for designing and interpreting experiments as well as developing and testing  
58 hippocampal models.

59

60

## 61 **Introduction**

62         Quantitative characterization of neurons is essential for understanding the  
63 functions of neuronal networks at different hierarchical levels. The hippocampus provides

64 an excellent test-bed for this exploration as it is one of the most intensively studied parts  
65 of the mammalian brain, and is involved in critical functions including learning (Rudy and  
66 Sutherland, 1989, 1995), memory (Eichenbaum et al., 1992; Eichenbaum, 2000, 2017),  
67 spatial navigation (Hafting et al. 2005; O'Keefe and Dostrovsky, 1971), and emotional  
68 associations (Buchanan, 2007).

69         Transmission of information between neurons is carried out by sequences of  
70 spikes, and firing rates are commonly believed to represent the intensity of input stimuli.  
71 Since the first discovery in sensory neurons (Adrian and Zotterman, 1926), this principle  
72 was generalized and extended to neurons from different brain regions including the  
73 hippocampus (McNaughton et al, 1983). However, it was also found that the firing rate of  
74 certain neurons is not constant over time even if the stimulus is permanently applied. One  
75 form of such time-dependent responses is spike frequency adaptation, manifested in a  
76 decrease of firing rate (Adrian and Zotterman, 1926). Neurons can produce diverse firing  
77 patterns in response to similar stimuli due to the inhomogeneity in their intrinsic properties  
78 (Connors and Gutnick, 1990). Both firing rates and temporal firing patterns are now  
79 recognized to play important roles in neural information coding (Ferster and Spruston,  
80 1995).

81         In electrophysiological experiments *in vitro*, hippocampal neurons demonstrate a  
82 vast diversity of firing patterns in response to depolarizing current injections. These  
83 patterns are referred to by many names, including delayed, adapting, accommodating,  
84 interrupted spiking, stuttering, and bursting (Canto and Witter 2012a,b; Hemond et al.,  
85 2008; Lübke et al, 1998; Mercer et al., 2007; Pawelzik et al., 2002; Tricoire et al., 2011).



86 Uncertainties and ambiguities in classification and naming of neuronal firing patterns are  
87 similar to other widely spread terminological inconsistencies in the neuroscience  
88 literature, posing obstacles to effective communication within and across fields  
89 (Hamilton et al., 2017).

90         Recent efforts aimed to develop firing pattern classification for identifying distinct  
91 electrical types of cortical neurons (Markram et al., 2004, 2015; Petilla Interneuron  
92 Nomenclature Group et al., 2008). Notably, statistical analysis of a large set of electrical  
93 features of neocortical interneurons with different firing patterns from a single lab yielded  
94 a refinement of the physiological component of the Petilla Nomenclature (Druckmann et  
95 al., 2013). However, comparisons across labs and experimental studies are typically  
96 limited to qualitative assessments of the illustrated firing traces or subjectively intuitive  
97 criteria. Moreover, firing pattern data are seldom unambiguously linked to neuron types  
98 independently defined by morphological and molecular criteria.

99         The Hippocampome.org knowledge base defines neuron types based on the  
100 locations of their axons, dendrites, and somata across 26 parcels of the rodent  
101 hippocampal formation, putative excitatory/inhibitory output, synaptic selectivity, and  
102 major and aligned differences in molecular marker expressions and biophysical properties  
103 (Wheeler et al., 2015). Version 1.3 of Hippocampome.org identified 122 neuron types in  
104 6 major areas: 18 in dentate gyrus (DG), 25 in CA3, 5 in CA2, 40 in CA1, 3 in subiculum  
105 (SUB), and 31 in entorhinal cortex (EC). The core assumption of this identification scheme  
106 is that neurons with qualitatively different axonal or dendritic patterns, or with multiple  
107 substantial differences in other dimensions, belong to different types. For the majority of

108 neuron types, Hippocampome.org reports 10 basic biophysical parameters that  
109 numerically characterize passive and spike properties ([hippocampome.org/ephys-defs](http://hippocampome.org/ephys-defs)),  
110 consistent with other literature-based neuroinformatics efforts (Tripathy et al., 2015).

111 Here, we developed an objective numerical protocol to automatically classify all  
112 published electrophysiological recordings of somatic spiking activity for morphologically  
113 identified hippocampal neurons from Hippocampome.org. This process revealed specific  
114 firing pattern phenotypes, potential neuronal subtypes, and statistical associations  
115 between firing responses and other properties. Inclusion of the classified firing patterns  
116 and their quantitative parameters, along with a comprehensive tabulation of the  
117 underlying experimental conditions, substantially extends the online search and browse  
118 functionalities of Hippocampome.org, providing a wealth of annotated data for quantitative  
119 analysis and modeling.

120

## 121 **Materials and Methods**

122 *Data collection, extraction and digitization.* The firing patterns of hippocampal neurons  
123 were classified based on their spiking responses to supra-threshold step-current pulses  
124 of different amplitude and duration as reported in peer-reviewed publications. Firing  
125 pattern parameters were extracted from electronic figures using Plot Digitizer  
126 ([plotdigitizer.sourceforge.net](http://plotdigitizer.sourceforge.net)) for all Hippocampome.org neuron types (Wheeler et al.,  
127 2015) for which they were available (90 out of 122). A total of 247 traces were analyzed.  
128 We extracted values of first spike latency (i.e. delay), inter-spike intervals (ISIs), and post-  
129 firing silence (in ms), as well as slow-wave amplitude (in mV) for burst firing recording.

130 For firing pattern identification and analysis, ISIs in each recording were normalized to  
131 the shortest inter-spike interval ( $ISI_{\min}$ ) within that time series, to allow meaningful  
132 comparison.

133 All analyzed recordings were obtained in normal artificial cerebrospinal fluids  
134 (ACSF) from rodents (rats 85%, mice 12%, and guinea pigs 3%) generally described as  
135 ‘young adults’ (ages ranging from 11 to 70 days for rats and from 10 to 56 days for mice).  
136 All firing traces considered in this report were recorded in slice preparations; 74% of  
137 electrophysiological traces were obtained using whole-cell patch clamp and 26%  
138 intracellular recording with sharp microelectrodes. All experimental conditions and  
139 solution compositions were extracted and stored with every recording and are available  
140 at Hippocampome.org as specified in the “Web portal” section below. Representative  
141 examples of ACSF and of solutions for pipette filling are shown in Table 1 and Table 2,  
142 respectively.

143 [Table 1 is near here]

144 [Table 2 is near here]

145 *Firing pattern classification.* Hippocampal neuron types display a variety of firing  
146 pattern elements in both their transient and steady state responses to continuous  
147 stimulation (Figure 1). Specifically, transients (which we label by dot-notation) can be  
148 visually differentiated into delay (D.), adapting spiking (ASP.), rapidly adapting spiking  
149 (RASP.), transient stuttering (TSTUT.), and transient slow-wave bursting (TSWB.).  
150 Steady states include silence (SLN), non-adapting spiking (NASP), persistent stuttering  
151 (PSTUT), and persistent slow-wave bursting (PSWB).

152

[Figure 1 is near here]

153           In certain cases, a constant current injection elicits firing patterns consisting of  
154 single firing pattern elements (NASP, PSTUT or PSWB). In other cases, complex firing  
155 patterns are observed as sequences of two or more firing pattern elements, such as  
156 delayed non-adapting spiking (D.NASP), silence preceded by adapting spiking  
157 (ASP.SLN), and non-adapting spiking preceded by delayed transient slow-wave bursting  
158 (D.TSWB.NASP). Experimental recordings without identifiable steady states were  
159 deemed uncompleted firing patterns (e.g. ASP., D.ASP., or RASP.ASP.).

160           In order to define the firing pattern elements unambiguously, we developed a set  
161 of quantitative classification criteria (Table 3). The transient response was classified as  
162 delayed (D.) if the latency to the first spike was longer than the sum of the first two inter-  
163 spike intervals ( $ISI_1$  and  $ISI_2$ ). Similarly, post-firing silence (PFS) was considered to be a  
164 steady state (SLN) if it exceeded the sum of the last two inter-spike intervals ( $ISI_{n-1}$  and  
165  $ISI_n$ ). In addition, post-firing silence had to last at least twice the longest inter-spike interval  
166 ( $ISI_{max}$ ).

167           A persistent firing response with relatively equal inter-spike intervals denotes non-  
168 adapting spiking (NASP); in contrast, transients with a progressive increase or decrease  
169 of ISIs can be classified as adapting or accelerating spiking, respectively. To discriminate  
170 among several possible combinations of these firing patterns objectively and  
171 reproducibly, we devised a minimum information description criterion by comparing  
172 piecewise (segmented) linear regression models of increasing complexity. Specifically,  
173 non-adapting spiking (NASP) can be described by a single parameter, namely the

174 (average) firing rate ( $Y=c$ ). Similarly, fitting normalized inter-spike intervals versus  
175 normalized time with a (2-parameter) linear function  $Y=aX+b$  (with  $a>0$ ) corresponds to  
176 adapting spiking (ASP.). Fitting data with a piecewise linear function

$$177 \quad Y = \begin{cases} a_1X + b_1 & \text{if } X < \frac{b_2 - b_1}{a_1 - a_2} \\ a_2X + b_2 & \text{if } X \geq \frac{b_2 - b_1}{a_1 - a_2} \end{cases}$$

178 corresponds to adapting-non-adapting spiking (ASP.NASP) when  $a_1>0$  and  $a_2=0$  (3  
179 parameters), and to adapting-adapting spiking with different adaptation rates (ASP.ASP.)  
180 when both  $a_1>0$  and  $a_2>0$  (4 parameters). We only selected a model with more  
181 parameters if the fit relative to a less complex model improved in a statistically significant  
182 way. The significance threshold for the differences between one-parameter fitting (NASP)  
183 and two-parameter linear-regression fitting (ASP.) was conventionally set at 0.05.  
184 Furthermore, in order to avoid identifying very weak adaptations as ASP., a minimum  
185 threshold of 0.003 was used for the slope  $a_1$ .

186 [Table 3 is near here]

187 For each subsequent stage of comparison, we used Bonferroni-corrected  $p$ -  
188 values. Specifically, in order for a pattern with an adapting spiking transient (i.e. ASP.) to  
189 be qualified as ASP.NASP, the  $p$ -value must be less than 0.025. Similarly, the  $p$ -value for  
190 the differences between three-parameter piecewise-linear-regression fitting (ASP.NASP)  
191 and four-parameter piecewise-linear-regression fitting (ASP.ASP.) must be less than  
192 0.016. Figure 2 shows examples of fitting spiking activity with linear regression and

193 piecewise linear regression models. If adaptation was only observed in the first two or  
194 three ISIs in a longer train of spikes, and if the linear fitting of slope  $a_1$  exceeded 0.2, then  
195 this transient was classified as rapidly adapting spiking (RASP.) (see Fig.1; cf. Pawelzik  
196 et al., 2002). For accelerating spiking (ACSP.), the linear fitting slope must be negative.

197 [Figure 2 is near here]

198 We defined transient stuttering (TSTUT.) as a short high-frequency (>25 Hz)  
199 cluster of action potentials (APs) followed by other distinctive activity. In addition, the first  
200 ISI after a TSTUT cluster must be 2.5 times longer than the last ISI of the cluster and 1.5  
201 times longer than the next ISI (see Fig. 1; cf. Hamam et al., 2000). Under transient slow-  
202 wave bursting activity (TSWB.), a cluster of two or more spikes rides on a slow  
203 depolarization wave (>5mV) followed by a strong slow after-hyperpolarization (AHP) (see  
204 Fig. 1; cf. Chevaleyre and Siegelbaum 2010). Persistent stuttering (PSTUT) was  
205 classified as firing activity with high-frequency clusters of APs separated by silence  
206 intervals >5 times longer than the sum of the preceding and following ISIs (see Fig. 1; cf.  
207 Fuentealba et al. 2010; Price et al. 2005). Similarly, under persistent slow-wave bursting  
208 (PSWB) activity, these clusters of two or more tightly grouped spikes ride on slow  
209 depolarizing waves (>5 mV) followed by strong, slow AHPs (Golomb et al. 2006; Bilkey  
210 and Schwartzkroin 1990). As exemplified above, the choices of firing pattern identification  
211 parameters were consistent with literature reports of experimental results with similar  
212 activities.

213 Algorithm Implementation. Based on the aforementioned methods, we  
214 implemented a firing pattern classification algorithm (Fig. 3) using the values of ISIs,

215 delay, post-firing silence, and slow-wave amplitude as input data. Firing pattern elements  
216 were identified based on calculated characteristics of responses (Table 3). First, it was  
217 determined whether the pattern contained a delay (D.), then whether it contained a  
218 TSTUT. or TSWB. The remaining ISIs were processed using the described statistical test  
219 to identify spike frequency adaptation (ASP., ASP.NASP, ASP.ASP.) by fitting the  
220 sequence of intervals with a piecewise linear function. In the case of an incomplete pattern  
221 or an insufficient number of ISIs to perform the test, the presence of post firing silence  
222 (SLN) was checked. If the test did not identify the pattern containing the adaptation, then  
223 the firing pattern was checked for the presence of PSTUT or PSWB, and then for NASP  
224 or RASP. If rapid adaptation was detected, the cycle with the statistical test was  
225 performed again on the remaining ISIs. The algorithm terminated upon detection of one  
226 of the steady states (SLN, NASP, PSTUT, or PSWB).

227 Software Accessibility. The classification algorithm was initially piloted in Microsoft  
228 Excel (Visual Basic) using Solver and the Data Analysis Toolbox (F-test and t-test) to  
229 perform piecewise linear fitting and statistical tests. The program was then re-  
230 implemented in the Java programming language using the Apache Commons  
231 Mathematics Library ([commons.apache.org/proper/commons-math](https://commons.apache.org/proper/commons-math/)). The Java  
232 implementation is available open source at [github.com/Hippocampome-](https://github.com/Hippocampome-Org/NeuroSpikePatterns)  
233 [Org/NeuroSpikePatterns](https://github.com/Hippocampome-Org/NeuroSpikePatterns).

234 [Figure 3 is near here]

235 Experimental Design and Statistical Analysis. We explored pairwise correlations  
236 between all observed firing patterns, firing pattern elements, and 316 properties of

237 Hippocampome.org neuron types, including: primary neurotransmitter; axonal, dendritic,  
238 and somatic locations in the 6 sub-regions and 26 parcels of the hippocampal formation;  
239 the projecting (between sub-regions) or local (within sub-regions) nature of axonal and  
240 dendritic patterns; axon and dendrite co-presence within any parcel; axonal and dendritic  
241 presence in a single layer only (intra-laminar) or in  $\geq 3$  layers (trans-laminar); clear positive  
242 or negative expression of any molecular markers; high (top third) or low (bottom third)  
243 values for biophysical properties (Wheeler et al., 2015); and potential connectivity  
244 patterns and super-patterns (Rees et al., 2016). To evaluate the correlations between  
245 these categorical properties, we used  $2 \times 2$  contingency matrices with Barnard's exact test  
246 (Barnard, 1947), which provides the greatest statistical power when row and column totals  
247 are free to vary (Lydersen et al., 2009). The correlation analysis was implemented in  
248 MATLAB (MathWorks, Inc.).

249 We analyzed numerical electrophysiological data, such as the relationship  
250 between the width of an action potential and the minimum ISI using linear regression and  
251 histograms. Spike duration was measured as the width at half-maximal amplitude as is  
252 most commonly defined (Bean, 2007). Minimum inter-spike intervals ( $ISI_{\min}$ ) were  
253 extracted from digitized recordings or directly from tables or textual excerpts of the  
254 corresponding papers.

255 For cluster analysis of weighted categorical firing pattern data, we assigned  
256 weights to firing pattern elements according to the formula  $W_e = (N - n_e) / N$ , where  $W_e$  is the  
257 weight of the element  $e$ ,  $n_e$  is the number of cell types expressing firing pattern(s) with  
258 element  $e$ ,  $N$  is the total number of cell types/subtypes, and  $e = \{\text{ASP.}, \text{D.}, \text{RASP.}, \text{NASP.},$



259 PSTUT, PSWB, SLN, TSUT., TSWB.}. We employed a two-step cluster analysis using  
260 the IBM SPSS Statistics 24 software. Silhouette measures of cohesion and separation  
261 greater than 0.5 indicated that the elements were well matched to their own clusters and  
262 poorly matched to neighboring clusters, and that the clustering configuration was  
263 appropriate.

264 Statistical data were expressed as mean  $\pm$  standard deviation.

265 *Web portal and database representation of firing patterns and experimental*  
266 *conditions.* Hippocampome.org provides access to morphological, molecular,  
267 electrophysiological, and connectivity information for 122 neuron types. The firing pattern  
268 data newly added and made freely available for download with this work include recording  
269 illustrations, the duration and amplitude of stimulation, digitized ISIs and firing pattern  
270 parameters (as comma-separated-value files), the complete solution compositions of the  
271 ACSF and of the micropipettes or patch pipettes, and the result of the firing pattern  
272 classification algorithm detailed above. Additional metadata is collected and displayed for  
273 all electrophysiological evidence in Hippocampome.org including the animal species (rat  
274 vs. mouse) and other details regarding the subject (inbred strain, age, sex, and weight, if  
275 reported), slice thickness and orientation, recording methods (intracellular microelectrode  
276 or variations of patch clamp), and temperature.

277 The implementation of Hippocampome.org supports the model-view-control  
278 software design. The model component defines the database interface and is provided  
279 solely by server-side code. The view component rendering the web pages and the control  
280 code implementing the decision logic are both served up by the server, but are run in the

281 user's browser. The underlying relational database ensures flexibility in establishing  
282 relations between data records.

283 Hippocampome.org is deployed on a CentOS 5.11 server running Apache 2.2.22  
284 and runs on current versions of several web browsers (Mozilla Firefox, Google Chrome,  
285 Apple Safari, and Microsoft Internet Explorer). Knowledge base content is served up to  
286 the PHP 5.3.27 website from a MySQL 5.1.73 database. Django 1.7.1 and Python 3.4.2  
287 provide database ingest capability of comma separated value annotation files derived  
288 from human-interpreted peer-reviewed literature. Hippocampome.org code is available  
289 at [github.com/Hippocampome-Org](https://github.com/Hippocampome-Org).

290

## 291 **Results**

### 292 ***From firing patterns to firing pattern phenotypes***

293 Version 1.3 of Hippocampome.org contains suitable electrophysiological recordings for  
294 90 of the 122 morphologically identified neuron types. Applying the firing pattern  
295 identification algorithm to these digitized data resulted in the detection of 23 different firing  
296 patterns. A given neuron type may demonstrate distinct firing patterns in response to  
297 different stimuli or conditions. The set of firing patterns exhibited by a given neuron type  
298 forms its firing pattern phenotype.

299 The simplest case consists of those neuron types that systematically demonstrate  
300 the same firing pattern independent of experimental conditions or stimulation intensity.  
301 These neuron types may still display quantitatively different responses to stimuli of

302 various amplitudes (typically increasing their firing frequency upon increasing  
303 stimulation), but their qualitative firing patterns remain the same. We identified 37 such  
304 “individual/simple-behavior types” in Hippocampome.org, as exemplified by DG Basket  
305 cells with their NASP phenotype (Savanthrapadian et al., 2014).

306 In contrast to the above scenario, certain neuron types exhibit qualitatively distinct  
307 firing patterns in response to different amplitudes of stimulation. We identified 21 such  
308 “multi-behavior” types; for instance, CA1 Neurogliaform cells (Price et al., 2005; Tricoire  
309 et al., 2011) display delayed firing, adapting spiking, and persistent stuttering at different  
310 stimulus intensities. The firing phenotype of these interneurons thus consists of the  
311 combination of all three firing patterns.

312 In a different set of cases, subsets of neurons from the same morphologically  
313 identified type display distinct firing patterns under the same experimental conditions  
314 (typically from the same study) in response to identical stimulation. These neuron types  
315 can thus be divided into electrophysiological subtypes. For example, of the CA3 Spiny  
316 Lucidum interneurons, some are adapting spikers whereas others are persistent  
317 stutterers (Szabadics and Soltesz, 2009). In certain neuron types, one or more of the  
318 subtypes could also display multiple behaviors at different stimulation intensities. For  
319 instance, a subset of entorhinal Layer III Pyramidal neurons consists of non-adapting  
320 spikers and another subset switches from ASP.NASP at rheobase to RASP.ASP. at  
321 higher stimuli (Canto and Witter, 2012b). Of the 90 neuron types with firing patterns in  
322 Hippocampome.org, 22 could be divided into 52 electrophysiological subtypes. Notably,  
323 these included the principal neurons of most sub-regions of the hippocampal formation:

324 CA3, CA1, and subiculum Pyramidal cells, entorhinal Spiny Stellate cells, but also several  
325 GABAergic interneurons such as Total Molecular Layer (TML) cells (Mott et al, 1997).  
326 Specifically, 8 neuron types yielded 18 subtypes exclusively demonstrating single  
327 behaviors; for 11 neuron types, at least one of the subtypes exhibited multi-behaviors,  
328 resulting in 13 multi-behavior subtypes and 13 additional single-behavior subtypes.

329 This meta-analysis is complicated by the variety of experimental conditions used  
330 in the published literature from which the electrophysiological data were extracted.  
331 Several differences in materials and methods could affect firing patterns above and  
332 beyond common species (rats vs. mice) or recording (patch clamp vs. microelectrode).  
333 For example, 30% of experimental traces were recorded from transverse slices, 24% from  
334 horizontal, 8% coronal, 29% mixed (e.g. “horizontal or semicoronal”), and 9% other  
335 directions (e.g. custom angles). Furthermore, pipettes were filled with potassium  
336 gluconate in 69% of cases, with potassium methanesulfate in 22%, and with potassium  
337 acetate in 9% (see e.g. Table 2). While these different experimental conditions can affect  
338 membrane biophysics substantially (Tebaykin et al., 2018) and often quantitatively  
339 influence neuronal firing (e.g. changing the spiking frequency), occasionally they can also  
340 cause a qualitative switch between distinct firing patterns. A striking case is that of rat DG  
341 Granule cells, which have demonstrated transient slow-wave burst followed by silence in  
342 whole-cell recordings of horizontal slices from Sprague-Dawley animals (Williams et al.,  
343 2007); delayed non-adapting spiking in whole-cell recording of transverse slices from  
344 Wistar animals (Lübke et al., 1998); or adapting spiking in intracellular recording of  
345 horizontal slices from Wistar animals (Han et al., 1993). Because the different firing  
346 patterns could be caused by the differences in experimental methods, we annotate a

347 possible “condition-dependence,” but cannot conclusively categorize these cells as multi-  
348 behavior or subtypes. Most of the condition-dependent behaviors could be attributed at  
349 least in part to the occasional use of microelectrode instead of patch-clamp (now  
350 considered the preferred recording method) or the animal species as in the case of CA1  
351 Horizontal Basket cells which display adapting and non-adapting firing in rats and mice,  
352 respectively (Zemankovics et al, 2010; Tricoire et al, 2011).

353 Condition dependence can alter the firing patterns not only in cell types with single  
354 behaviors, such as MOPP cells (Han et al., 1993; Armstrong et al., 2011), but also in  
355 multi-behavior neuron types, such as CA1 Axo-Axonic cells (Buhl et al., 1994; Pawelzik  
356 et al., 2002). These cases account for 6 and 4 Hippocampome.org neuron types,  
357 respectively. Lastly, condition dependence may also be found in specific  
358 electrophysiological subtypes, whether they display single behaviors, such as CA1  
359 Pyramidal neurons (Chevaleyre and Siegelbaum, 2010; Zemankovics et al, 2010; Kirson  
360 and Yaari, 2000; Staff et al., 2000) or multi-behavior, such as entorhinal Layer V Deep  
361 Pyramidal neurons (Canto and Witter, 2012; Hamam et al., 2000; Hamam et al., 2002).  
362 These cases respectively account for 2 and 1 Hippocampome.org neuron types, in turn  
363 giving rise to 6 condition-dependent subtypes with single behaviors and 2 condition-  
364 dependent subtypes with multi-behavior.

365 Figure 4 presents the full firing pattern phenotypes of all 90 Hippocampome.org  
366 neurons with available data in form of separate matrices for the 68 individual neuron types  
367 (Fig. 4A) and the 52 subtypes divided from the remaining 22 types (Fig. 4B). In both cases  
368 the simple behaviors constitute larger proportions than multi-behavior with condition

369 dependence only reported for a minority of types and subtypes (Fig. 4C). Across these  
370 neuron types/subtypes, 44 distinct phenotypes can be identified as unique combinations  
371 of firing patterns, excluding those that differ from others only by the absence of a  
372 detectable stable state in one of the firing patterns (like ASP. versus ASP.NASP or  
373 ASP.SLN). An interactive online version of these matrices is available at  
374 [hippocampome.org/firing\\_patterns](http://hippocampome.org/firing_patterns).

375 [Figure 4 is near here]

376

### 377 ***Dissecting firing patterns into firing pattern elements across neuron types***

378 Firing patterns and firing pattern elements are also diverse with respect to their relative  
379 frequency of occurrence among hippocampal neuron types. Firing patterns can be  
380 grouped based on the number of elements comprising them, namely single (e.g., NASP  
381 or PSTUT), double (e.g. ASP.NASP or TSWB.SLN), and triple (D.RASP.NASP and  
382 D.TSWB.NASP) or based on whether they are completed (ASP.NASP, TSWB.SLN) or  
383 uncompleted, as in ASP., RASP.ASP., and TSTUT.ASP. (Fig. 5A). Of the nine firing  
384 pattern elements, the most frequent are ASP and NASP, while the least common are  
385 TSTUT, TSWB, and PSWB (Fig. 5B). Notably, accelerated spiking (ACSP) has not been  
386 reported in the rodent hippocampus although it is commonly observed in other neural  
387 systems, such as turtle ventral horn interneurons (Smith and Perrier 2006) and  
388 motoneurons (Leroy et al. 2014).

389 The relationships between sets of firing pattern elements observed in hippocampal  
390 neuron types can be summarized in a Venn diagram with firing pattern elements  
391 represented as ellipses and the intersections thereof corresponding to complex firing  
392 patterns (Fig. 5C). This analysis highlights the following features: the four main firing  
393 transients (ASP., RASP., TSTUT., TSWB.) often end either with NASP or with SLN; ASP.  
394 is often preceded by RASP. and occasionally by TSTUT.; interrupted steady-state firings  
395 (PSTUT and PSWB) stand out as a separate group; and delay (D.) most often precedes  
396 NASP.

397 [Figure 5 is near here]

398 Our classification of firing pattern elements implies the possibility of three completed  
399 single-element firing patterns (NASP, PSTUT, PSWB) and 19 completed double-element  
400 firing patterns consisting of one of four steady states (SLN, NASP, PSTUT, PSWB)  
401 preceded by one of five transients (D, ASP, RASP, TSTUT, TSWB), with exclusion of the  
402 “empty” combination D.SLN. Also, four double-transients are possible after an initial  
403 delay, resulting in an additional 16 triple-element firing patterns. Only 15 of these possible  
404 38 completed firing patterns were discovered in literature data for morphologically  
405 identified hippocampal neuron types (Table 4). Three additional firing patterns were found  
406 in other neurons: D.PSWB has been shown in the cultured *rutabaga* mutant giant neuron  
407 of *Drosophila* (Zhao and Wu 1997), D.ASP.SLN in the neuron of the external lateral  
408 subnucleus of the lateral parabrachial nucleus (Hayward and Felder 1999), and  
409 D.TSTUT.SLN in the striatal fast-spiking neuron (Sciamanna and Wilson 2011). We  
410 deemed 16 firing patterns as “not found but possible” (white shading and black text in

411 Table 4) and 4 firing patterns as “improbable” (white shading and gray text). In particular,  
412 we consider combination of stuttering and slow-wave bursting (TSWB.PSTUT or  
413 TSTUT.PSWB) as unlikely to occur under physiological conditions from a dynamical  
414 viewpoint due to incompatible underlying mechanisms. Slow-wave bursting is provided  
415 by a slow negative feedback which terminates the burst of action potential evoking slow  
416 AHP. Such feedback could be produced by different ionic mechanisms, but it is most  
417 typically based on intracellular  $Ca^{2+}$  dynamics and  $Ca^{2+}$ -activated  $K^+$  current (Golomb et  
418 al. 2006; Xu and Clancy 2008) or muscarinic-sensitive  $K^+$  current (Golomb et al. 2006).  
419 Slow-wave bursting could be “square-wave bursting”, with one slow process, or “parabolic  
420 bursting”, with two (positive and negative feedback) slow processes (Rinzel and  
421 Ermentrout 1998). In contrast, stuttering activity is associated with “elliptic bursting”  
422 (Golomb et al. 2007), where the silent phase is characterized by dumping and growing  
423 fast (spiking) oscillations as the trajectory slowly drift through bifurcation of the fast  
424 subsystem (Rinzel and Ermentrout 1998). Suggested mechanism for stuttering in fast  
425 spiking interneurons includes  $Na^+$  “window” current that induces high frequency tonic  
426 firing, and slowly inactivating  $K^+$  current through KV1 channels (Golomb et al. 2007).

427 [Table 4 is near here]

428

#### 429 ***Classification and distribution of firing pattern phenotypes***

430 In order to classify the 44 unique firing pattern phenotypes observed in the hippocampal  
431 formation, we weighted the constituent firing pattern elements according to the frequency  
432 of occurrence among 120 neuron types and electrophysiological subtypes (see *Materials*



433 *and Methods*). As a result, infrequent firing pattern elements (PSWB, TSTUT and TSWB)  
434 received high weights (0.99, 0.95 and 0.93, respectively), very frequent elements (ASP  
435 and NASP) were assigned low weights (0.42 and 0.41), and common elements (D, RASP,  
436 PSTUT and SLN) obtained intermediate weights (0.90, 0.80, 0.88 and 0.87). Two-step  
437 cluster analysis identified ten firing pattern families as leaves of a seven-level hierarchical  
438 binary tree (Fig. 6A). At the highest level, hippocampal neuron types and subtypes are  
439 divided into two major groups: those with spiking phenotypes (78%) and those with  
440 interrupted firing phenotypes (22%). The latter are separated into bursting (6%) and  
441 stuttering (16%), and each of these is subdivided into persistent and non-persistent  
442 families. A first group of the neuron types with spiking phenotypes is distinguished based  
443 on delay (9% of cell types). The remaining neuron types split into adapting (54%) and  
444 non-adapting phenotypes (15%). The adapting group consists of neuron types with  
445 rapidly adapting phenotypes (18%) and normally adapting (36%) phenotypes. Among the  
446 normally adapting group, the following phenotypes can be distinguished: discontinuous  
447 adapting spiking (6%) with ASP.SLN pattern, adapting-non-adapting spiking (15%) with  
448 ASP.NASP patterns, and a last “spurious” phenotype of uncompleted adapting spiking  
449 (15%) with ASP. pattern only, for which the steady state (SLN or NASP) was not  
450 determined. This division of the adapting spiking groups reflects differences in adaptation  
451 rates, duration, and subsequent steady states.

452 This analysis also highlights the most distinguishing firing pattern elements of each  
453 family (Fig. 6B). In particular, D. is the defining element for delayed spiking, PSTUT for  
454 persistent stuttering, ASP. and SLN for discontinuous adapting spiking. Each of the four  
455 major elements of interrupted firing patterns (PSWB, PSTUT, TSWB. and TSTUT.) is

456 observed in a single firing pattern phenotype (persistent bursting, non-persistent bursting,  
457 persistent stuttering, and non-persistent stuttering, respectively). Other firing pattern  
458 elements (D., RASP., ASP., NASP, and SLN) appear in several firing pattern phenotypes.  
459 The proportions of non-defining firing pattern elements range from 5% to 83%.

460 The families of firing pattern phenotypes are differentially distributed within the set  
461 of 120 neuron types/subtypes (Fig. 6C). Certain phenotype families are associated with  
462 excitatory neuron types, either exclusively (e.g. persistent bursting and non-persistent  
463 bursting) or predominantly (non-persistent stuttering, rapidly adapting, and adapting-non-  
464 adapting spiking). Conversely, persistent stuttering, delayed spiking, non-adapting  
465 spiking and simple adapting spiking are phenotypes composed largely by inhibitory  
466 neuron types. The discontinuous adapting spiking phenotype has relatively balanced  
467 proportions of excitatory and inhibitory neuron types.

468 The firing pattern phenotypes also have different distributions among the sub-  
469 regions of the hippocampal formation (Fig. 6D). Among CA1 neuron types, the persistent  
470 stuttering (16%), non-adapting (24%), simple adapting (16%), and rapidly adapting  
471 spiking (13%) phenotypes are more common than other phenotypes; in DG, the most  
472 expressed phenotypes are delayed (20%), rapidly adapting (20%), and simple adapting  
473 spiking (15%); in EC, ASP-NASP (61%), discontinuous ASP. (11%), RASP. (28%), and  
474 NASP (19%) occur more often than other phenotypes.

475 [Figure 6 is near here]

476

## 477 ***Usage of information from Hippocampome.org***

478 *Searching and Browsing.* The addition of firing pattern data to Hippocampome.org  
479 extends opportunities for broad-scope analytics and quick-use checks of neuron types.  
480 Similar to morphological, molecular, and biophysical information, firing patterns and their  
481 parameters can be browsed online with the interactive versions of the matrices presented  
482 in Figure 4 ([hippocampome.org/firing\\_patterns](http://hippocampome.org/firing_patterns)), along with an accompanying matrix to  
483 browse the stimulation parameters (duration and intensity) and the firing pattern  
484 parameters (delay, number of inter-spike intervals, etc.).

485 Moreover, all classification and analysis results reported here can be searched  
486 with queries containing AND & OR Boolean logic using an intuitive graphical user  
487 interface (see Hippocampome.org → Search → Neuron Type). The integration within the  
488 existing comprehensive knowledge base enables any combination of both qualitative (e.g.  
489 PSTUT) and quantitative (e.g.  $\frac{ISI_i^{\max}}{ISI_{i+1}} > 10$ ) firing pattern properties with molecular (e.g.  
490 calbindin-negative), morphological (e.g. axons in CA1 pyramidal layer), and biophysical  
491 (e.g. action potential width < 1 ms) filters (Fig. 7). For example, of 14 neuron types with  
492 persistent stuttering, in 5 the maximum inter-spike interval is at least an order of  
493 magnitude longer than the subsequent spike. When adding the other three selected  
494 criteria, the compound search leads to a single hit: CA1 Axo-axonic neurons (Fig. 7A).  
495 Clicking on this result leads to the interactive neuron page (Fig. 7B) where all information  
496 associated with a given neuron type is logically organized, including synonyms,  
497 morphology, biophysical parameters, molecular markers, synaptic connectivity, and firing  
498 patterns. Every property on the neuron pages and browse matrices, including firing

499 patterns and their parameters, links to a specific evidence page that lists all supporting  
500 bibliographic citations, complete with extracted quotes and figures (Fig. 7C). The  
501 evidence page also contains a table with all corresponding firing pattern parameters (Fig.  
502 7D), experimental details including information about animals (Fig. 7E), preparations (Fig.  
503 7F), recording method and intra-pipette solution (Fig. 7G), ACSF (Fig. 7H), and a  
504 downloadable file of inter-spike intervals (Fig. 7I).

505 [Figure 7 is near here]

506 The portal also reports, when available, the original firing pattern name  
507 descriptions used by the authors of the referenced publication (Hippocampome.org →  
508 Search → Original Firing Pattern).

509 *Statistical analysis of categorical data.* Firing pattern information more than doubles  
510 the Hippocampome.org knowledge base capacity to over 27,000 pieces of knowledge,  
511 that is, associations between neuron types and their properties. This extension allows the  
512 unearthing of hidden relationships between firing patterns and molecular, biophysical, and  
513 morphological data in hippocampal neurons, which are otherwise difficult to find amongst  
514 the large body of literature. Several interesting examples of such findings are presented  
515 in Box 1. For instance, adapting spiking (ASP.) tends to co-occur with expression of  
516 cholecystokinin ( $p=0.0113$  with Barnard's exact test from all  $n = 26$  pieces of evidence);  
517 moreover among 284 analyzed recordings there are no neurons with extremely high input  
518 resistance that show persistent stuttering (PSTUT) ( $p=0.0478$ ).

519 [Box 1 is near here]

520 *Analysis of numerical electrophysiological data.* The extracted quantitative data  
521 allow one to study the relationship between firing pattern parameters and membrane  
522 biophysics or spike characteristics, such as the correlations between minimum inter-spike  
523 intervals ( $ISI_{\min}$ ) and action potential width ( $AP_{\text{width}}$ ). We analyzed these two variables in  
524 the 81 neuron types and subtypes for which both measurements are available (Fig. 8).  
525 The scatter plot of  $AP_{\text{width}}$  against  $ISI_{\min}$  reveals several distinct groupings (Fig. 8A), and  
526 the corresponding histograms (Figs. 8B,C) demonstrate poly-modal distributions. The  
527 horizontal dashed line ( $ISI_{\min}=34$  ms) separates 9 neurons with slow spikes (all excitatory  
528 except one) from 72 neurons (61% of which are inhibitory) with fast and moderate spikes.  
529 The latter group shows a general trend of  $ISI_{\min}$  rise with increasing  $AP_{\text{width}}$  (black dashed  
530 line in panel A). This trend was adequately fit with a linear function  $Y = 13.79X - 0.05$  ( $R$   
531  $= 0.72$ ;  $p=0.03$ ). Neuron types with slow spikes demonstrate the opposite trend, which  
532 was fit with a decreasing linear function  $Y = - 26.72X + 76.42$  ( $R = -0.91$ ,  $p=10^{-6}$ ).  
533 Furthermore, the neuron types can be separated by spike width. The vertical dashed lines  
534  $w1$  ( $AP_{\text{width}}=0.73$  ms) and  $w2$  ( $AP_{\text{width}}=1.12$  ms) separate neuron types with narrow,  
535 medium and wide action potentials. The group of neuron types with narrow spikes ( $n=22$ )  
536 includes only inhibitory neurons, which have  $AP_{\text{width}}$  in the range from 0.20 to 0.73 ms  
537 ( $0.54 \pm 0.12$  ms). In contrast, the group of neuron types with wide spikes ( $n=28$ ) contains  
538 only excitatory neurons with  $AP_{\text{width}}$  in the range from 1.13 to 2.10 ms ( $1.49 \pm 0.23$  ms).  
539 The group of neuron types with medium spikes ( $n = 31$ ), with  $AP_{\text{width}}$  range from 0.74 to  
540 1.12 ms ( $0.89 \pm 0.12$  ms), includes a mix of inhibitory (74%) and excitatory (26%) neurons.

541 [Figure 8 is near here]

542           Among the 22 neuron types/subtypes from the group with  $AP_{width} < 0.72$  ms, 13  
543 demonstrated so-called fast spiking behavior, which is distinguished by narrow spikes,  
544 high firing rate, and the absence or weak expression of spike frequency adaptation (Jonas  
545 et al., 2004). Besides these common characteristics, however, their firing patterns vary  
546 broadly even from a qualitative standpoint. Five of these 13 neuron types belong to the  
547 PSTUT family, namely CA3 Trilaminar (Gloveli et al., 2005), CA3 Aspiny Lucidum ORAX  
548 (Spruston et al., 1997), CA2 Basket (Mercer et al., 2007), CA1 Axo-axonic (Pawelzik et  
549 al., 2002), and CA1 Radial Trilaminar (Tricoire et al., 2011). Three types belong to the  
550 NASP family: DG Basket (Savanthrapadian et al., 2014), CA1 Horizontal Axo-axonic  
551 (Tricoire et al, 2011), and MEC LIII Superficial Multipolar Interneuron (Kumar and  
552 Buckmaster 2006). Two types, CA3 Axo-axonic (Dugladze et al., 2012) and CA2  
553 Bistratified (Mercer et al., 2007), belong to the simple adapting spiking family; two types,  
554 DG HICAP (Mott et al., 1997) and DG AIPRIM (Lubke et al, 1998; Scharfman 1992),  
555 belong to the ASP-NASP family; and lastly CA1 Basket (Lee et al., 2011) belongs to non-  
556 persistent stuttering family.

557           Additionally, firing pattern families are unequally distributed among the groupings  
558 revealed by the above analysis. Persistent and non-persistent stuttering families and non-  
559 persistent bursting phenotypes are composed entirely of neuron types with narrow and  
560 medium fast/moderate spikes. Conversely, the rapidly adapting – non-adapting spiking  
561 phenotype is represented solely by neurons with spikes of intermediate width.

562

## 563 **Discussion**

564 Neurons differ from each other by morphological and molecular features including the  
565 diversity and distribution of ion membrane channels in somata and dendrites. These  
566 intrinsic properties determine important physiological functions such as excitability,  
567 efficacy of synaptic inputs (Häusser et al., 2000; London et al., 2002; Komendantov and  
568 Ascoli, 2009), shapes of individual action potentials and their frequency (Bean, 2007),  
569 and temporal patterns (Mainen and Sejnowski, 1996; Krichmar et al., 2006).

570 In the neuroscience literature, the firing patterns of neuronal activity are commonly  
571 used to characterize or identify groups of neurons. Examples include descriptions of  
572 “strongly adapting, normally adapting, and nonadapting cells” (Mott et al., 1997); “fast-  
573 spiking and non-fast-spiking” interneurons (Bjorefeldt et al., 2016); “late spiking” cells  
574 (Tamas et al., 2003); “stuttering interneurons” (Song et al., 2013); “bursting” and “non-  
575 bursting” neurons (Hablitz and Johnston, 1981; Maskawa et al., 1982); “regular spiking,  
576 bursting, and fast spiking” (McCormick et al., 1985), and many more. However, it has until  
577 now remained challenging to integrate these characterizations across different  
578 laboratories and studies besides largely qualitative summaries.

579 In this study, we show that a quantitative, data-driven methodology based on the  
580 analysis of transients and steady states of evoked spiking activity can meaningfully  
581 classify the firing patterns of hippocampal neuronal types. This work is a further  
582 development of the effort initiated by the Petilla Interneuron Nomenclature Group (2008),  
583 which was applied to firing patterns in cortical neurons (Druckmann et al., 2013; Markram  
584 et al., 2015). At the same time, this work demonstrates the feasibility of systematic,  
585 comprehensive meta-analysis of electrophysiological data from the published literature.

586 This is especially important as a necessary approach to help link and interpret the growing  
587 information from centralized, large-scale, “industrial” neuroscience projects (Kandel et al.,  
588 2013; Migliore et al., 2018; Teeter et al., 2018), with the distributed accumulation of data  
589 in traditional research laboratories (Ferguson et al., 2014).

590 From the electrophysiological recordings of 90 neuron types in the rodent  
591 hippocampus, we identified 23 firing patterns, 15 of which were completed, that is,  
592 included both transient(s) and putative steady state components (see Figs. 4 and 5).  
593 Taking into consideration the firing pattern information enables a possible refinement of  
594 neuron type delineation by identifying 52 putative electrophysiological subtypes among  
595 22 neuron types. Subsequent two-step cluster analysis allows for the clear distinguishing  
596 of 9 unique families of 44 firing pattern phenotypes among 120 neuron types and putative  
597 subtypes. Notwithstanding the focus of the present research on the hippocampal  
598 formation, the firing pattern classification framework introduced with this study can be  
599 readily applied to spiking activity of neurons from other brain regions.

600 The two firing pattern families characterized by bursting phenotypes (transient and  
601 persistent) are comprised of excitatory neurons, while the persistent stuttering family only  
602 included inhibitory neurons. However, the majority of phenotype families are mixed  
603 between putatively glutamatergic and GABAergic types (Fig. 6B). Thus, the identification  
604 of a firing pattern phenotype by itself is a useful but in most cases insufficient attribute for  
605 a reliable categorization of excitatory and inhibitory neurons.

606 The frequency of discharges is an important characteristic of neuronal  
607 communication. Many neuron types, especially interneurons, show fast spiking behavior:



608 they are capable of firing at high frequencies (200 Hz or more) with little decrease in  
609 frequency during prolonged stimulation (Jonas et al., 2004; Bean 2007). Spike frequency  
610 correlates with electrophysiological characteristics, such as action potential duration or  
611 fast AHP amplitude (Druckmann et al., 2013). Fast spiking neurons typically have narrow  
612 action potentials and high-amplitude fast AHP (Bean 2007). Our correlation analysis of  
613 Hippocampome.org data reveals that transient stuttering (TSTUT.) is not typical for cells  
614 with extremely high-amplitude fast AHPs and delayed firing (D.) is not characteristic for  
615 neuron types with wide action potentials (Box 1). Interestingly, plotting  $ISI_{\min}$  against  
616  $AP_{\text{width}}$  for all neuron types with relatively faster firing (maximum frequencies higher than  
617 ~30 Hz) and for all neuron types with slower firing (maximum frequencies lower than 29  
618 Hz) reveals opposite, statistically significant linear relationships (Fig. 8A).

619 Firing pattern phenotypes of central mammalian neurons are determined by  
620 biophysical properties associated with expression and distribution of several types of  $Ca^{2+}$   
621 and  $K^+$  channels, which modulate specific ion currents (Llinás 1988; Migliore and  
622 Shepherd, 2005; Bean, 2007), as well as with expression of other molecular markers  
623 (Caballero et al., 2014; Markram et al., 2004; Petilla Interneuron Nomenclature Group et  
624 al., 2008). Despite the relative sparsity of molecular marker information, analysis of the  
625 correlations between firing patterns and other neuronal properties revealed novel  
626 interesting relationships in hippocampal neuron types (see Box 1 for illustrative  
627 examples).

628 Firing patterns play important roles in neural networks including the representation  
629 of input features, transmission of information, and synchronization of activity across

630 separate anatomical regions or distinct cell assemblies. Although single spikes can  
631 provide temporally precise neurotransmitter release, this release usually has low  
632 probability in central synapses. Neurons can compensate for the unreliability of their  
633 synapses by transmitting signals via multiple synaptic endings or repeatedly activating a  
634 single synapse (Lisman, 1997). Thus, spikes grouped together in bursting or stuttering  
635 activity increase the probability of transmission via unreliable synapses compared to  
636 separate spikes with the same average frequency. In the hippocampus, a single burst  
637 can produce long-term synaptic potentiation or depression (Lisman, 1997). It has also  
638 been hypothesized that, due to the interplay between short-term synaptic depression and  
639 facilitation, bursting with certain values of ISIs are more likely to cause a postsynaptic cell  
640 to fire than bursts with higher or lower frequencies (Izhikevich et al., 2003). Recent results  
641 have also revealed that single bursts in hippocampal neurons may selectively alter  
642 specific functional components of the downstream circuit, such as feedforward inhibitory  
643 interneurons (Neubrandt et al., 2018).

644 Experimental studies provide strong evidence that different brain circuits employ  
645 distinct schemes to encode and propagate information (Xu et al, 2012): while information  
646 relay by isolated spikes is insignificant for the acquisition of recent contextual memories  
647 in the hippocampus, it is essential for memory function in the medial prefrontal cortex.  
648 However, even within the hippocampus, different neuronal circuits may employ distinct  
649 coding schemes by relying on isolated spikes or bursts of spikes for execution of critical  
650 functions (Xu et al, 2012). Indeed, distinct sub-regions of the hippocampal formation show  
651 differential distributions of spiking, bursting, and stuttering firing pattern phenotypes (Fig.  
652 6).

653           In this study, the phenotyping of most types of neurons was relied on the  
654 digitization and quantitative analysis of single (or limited numbers of) experimental  
655 recordings of electrical activity extracted from many relevant publications. Until  
656 neuroscience switches to the systematic deposition of all firing traces recorded and  
657 analyzed for a given publication to public repositories, such representative illustrations,  
658 however limited, constitute a fairly accurate reflection of the communal knowledge about  
659 neuronal physiology in particular neural system. Thus, our approach is based on the  
660 statistical quantification of integrated data presented in the literature.

661           The findings presented in this report resulted from the analysis of firing patterns in  
662 response to depolarizing current. To this date, this is by far the most common  
663 experimental protocol for characterizing the neuronal input-output function. Nevertheless,  
664 different types of neurons also exhibit distinct responses to hyperpolarization, as well as  
665 to its termination. For example, several neuron types described in Hippocampome.org  
666 demonstrate rebound spiking: CA1 Trilaminar (Tricoire et al., 2011, Sik et al., 1995), CA1  
667 Back-Projection (Sik et al., 1994), CA1 O-LM (Sik et al., 1995), CA1 SO-SO (Pawelzik et  
668 al., 2002), MEC LIII Multipolar Interneuron (Kumar and Buckmaster 2006), MEC LII  
669 Stellate (Canto and Witter 2012b), MEC LII Oblique Pyramidal (Canto and Witter 2012b).  
670 Such neuronal behaviors, owing to the hyperpolarization-activated cation current (h-  
671 current), may play an important role in hippocampal rhythmogenesis (raHasselmo 2014)  
672 and could be locally modulated by activity-dependent changes in intrinsic excitability  
673 (Ascoli et al., 2010). It will therefore be interesting to extend the current firing pattern  
674 phenotyping by considering these additional neuronal properties in future work.

675           The information on firing patterns of neuron types further expands the rich  
676 knowledge base of neuronal properties Hippocampome.org, which already contained  
677 information on morphology, molecular marker expression, connectivity, and other  
678 electrophysiological characteristics (Wheeler et al., 2015). Computation of the potential  
679 connectivity map of all known 122 neuron types by supplementing available synaptic data  
680 with spatial distributions of axons and dendrites enabled the reconstruction of a circuitry  
681 containing more than 3200 putative connections (Rees et al., 2016).

682           Further development also includes simulation of firing activity of different neuron  
683 types based on dynamical systems modeling (Venkadesh et al., 2018). This ongoing  
684 accumulation of data and knowledge makes Hippocampome.org a powerful tool for  
685 building real-scale models of the entire hippocampal formation, thus substantially  
686 expanding the potential scope of recent advances in this regard (Bezaire et al., 2016).  
687 More generally, such knowledge bases are playing an increasingly important role in  
688 neuroscience research by fostering computational analyses and data-driven simulations.

689

## 690 **References**

691   Adrian ED, Zotterman Y (1926) The impulses produced by sensory nerve endings: Part  
692   3. Impulses set up by touch and pressure. *J Physiol* 61:465-483.

693

694   Ali AB, Thomson AM (1998) Facilitating pyramid to horizontal oriens-alveus interneurone  
695   inputs: dual intracellular recordings in slices of rat hippocampus. *J Physiol* 507:185-199.

696

697 Armstrong C, Szabadics J, Tamás G, Soltesz I (2011) Neurogliaform cells in the  
698 molecular layer of the dentate gyrus as feed-forward  $\gamma$ -aminobutyric acidergic modulators  
699 of entorhinal-hippocampal interplay. *J Comp Neurol* 519:1476-1491.

700

701 Ascoli GA, Brown KM, Calixto E, Card JP, Galván EJ, Perez-Rosello T, Barrionuevo G  
702 (2009) Quantitative morphometry of electrophysiologically identified CA3b interneurons  
703 reveals robust local geometry and distinct cell classes. *J Comp Neurol* 515:677-695.

704

705 Ascoli GA, Gasparini S, Medinilla V, Migliore M (2010) Local control of postinhibitory  
706 rebound spiking in CA1 pyramidal neuron dendrites. *J Neurosci* 30:6434-6442.

707

708 Barnard GA (1947) Significance tests for  $2 \times 2$  tables. *Biometrika* 34:123–138.

709

710 Bean BP (2007) The action potential in mammalian central neurons. *Nat Rev Neurosci*  
711 8:451-465.

712

713 Bezaire MJ, Raikov I, Burk K, Vyas D, Soltesz I (2016) Interneuronal mechanisms of

714 hippocampal theta oscillations in a full-scale model of the rodent CA1 circuit. *Elife* 5:  
715 e18566. doi: 10.7554/eLife.18566.

716

717 Bilkey DK, Schwartzkroin PA (1990) Variation in electrophysiology and morphology of  
718 hippocampal CA3 pyramidal cells. *Brain Res* 514:77-83.

719

720 Bjorefeldt A, Wasling P, Zetterberg H, Hanse E (2016) Neuromodulation of fast-spiking  
721 and non-fast-spiking hippocampal CA1 interneurons by human cerebrospinal fluid. *J*  
722 *Physiol* 594:937-952.

723

724 Buchanan TW (2007) Retrieval of emotional memories. *Psychol Bull* 133: 761-779.

725

726 Buhl EH, Han ZS, Lörinczi Z, Stezhka VV, Karnup SV, Somogyi P (1994) Physiological  
727 properties of anatomically identified axo-axonic cells in the rat hippocampus. *J*  
728 *Neurophysiol* 71:1289-1307.

729

730 Bullis JB, Jones TD, Poolos NP (2007) Reversed somatodendritic I(h) gradient in a class  
731 of rat hippocampal neurons with pyramidal morphology. *J Physiol* 579:431-443.

732

733 Caballero A, Flores-Barrera E, Cass DK, Tseng KY (2014) Differential regulation of  
734 parvalbumin and calretinin interneurons in the prefrontal cortex during adolescence. *Brain*  
735 *Struct Funct* 219:395-406.

736

737 Canto CB, Witter MP (2012a) Cellular properties of principal neurons in the rat entorhinal  
738 cortex. I. The lateral entorhinal cortex. *Hippocampus* 22:1256-1276.

739

740 Canto CB, Witter MP (2012b) Cellular properties of principal neurons in the rat entorhinal  
741 cortex. II. The medial entorhinal cortex. *Hippocampus* 22:1277-1299.

742

743 Chevaleyre V, Siegelbaum SA (2010) Strong CA2 pyramidal neuron synapses define a  
744 powerful disynaptic cortico-hippocampal loop. *Neuron* 66:560-572.

745

746 Connors BW, Gutnick MJ (1990) Intrinsic firing patterns of diverse neocortical neurons.  
747 *Trends Neurosci* 13:99-104.

748

749 Druckmann S, Hill S, Schürmann F, Markram H, Segev I (2013) A hierarchical structure  
750 of cortical interneuron electrical diversity revealed by automated statistical analysis.  
751 *Cereb Cortex* 23:2994-3006.

752

753 Dugladze T, Schmitz D, Whittington MA, Vida I, Gloveli T (2012) Segregation of axonal  
754 and somatic activity during fast network oscillations. *Science* 336:1458-1461.

755

756 Eichenbaum H (2000) A cortical-hippocampal system for declarative memory. *Nat Rev*  
757 *Neurosci* 1:41-50.

758

759 Eichenbaum H (2017) The role of the hippocampus in navigation is memory. *J*  
760 *Neurophysiol.* 117:1785-1796.

761

762 Eichenbaum H, Otto T, Cohen NJ (1992) The hippocampus - what does it do? *Behav*  
763 *Neural Biol* 57:2-36.

764

765 Ferguson AR, Nielson JL, Cragin MH, Bandrowski AE, Martone ME (2014) Big data from  
766 small data: data-sharing in the 'long tail' of neuroscience. *Nat Neurosci* 17:1442-1447.

767

768 Ferster D, Spruston N (1995) Cracking the neuronal code. *Science* 270:756-757.

769



770 Fuentealba P, Klausberger T, Karayannis T, Suen WY, Huck J, Tomioka R, Rockland K,  
771 Capogna M, Studer M, Morales M, Somogyi P (2010) Expression of COUP-TFII nuclear  
772 receptor in restricted GABAergic neuronal populations in the adult rat hippocampus. *J*  
773 *Neurosci* 30:1595-1609.

774

775 Gloveli T, Dugladze T, Saha S, Monyer H, Heinemann U, Traub RD, Whittington MA, Buhl  
776 EH (2005) Differential involvement of oriens/pyramidal interneurons in hippocampal  
777 network oscillations *in vitro*. *J Physiol* 562:131-147.

778

779 Golomb D, Donner K, Shacham L, Shlosberg D, Amitai Y, Hansel D (2007) Mechanisms  
780 of firing patterns in fast-spiking cortical interneurons. *PLoS Comput Biol* 3(8):e156. doi:  
781 10.1371/journal.pcbi.0030156.

782

783 Golomb D, Yue C, Yaari Y (2006) Contribution of persistent Na<sup>+</sup> current and M-type K<sup>+</sup>  
784 current to somatic bursting in CA1 pyramidal cells: combined experimental and modeling  
785 study. *J Neurophysiol* 96:1912-1926.

786

787 Gulyás AI, Szabó GG, Ulbert I, Holderith N, Monyer H, Erdélyi F, Szabó G, Freund TF,  
788 Hájos N (2010) Parvalbumin-containing fast-spiking basket cells generate the field

789 potential oscillations induced by cholinergic receptor activation in the hippocampus. J  
790 Neurosci 30:15134-15145.

791

792 Hablitz JJ, Johnston D (1981) Endogenous nature of spontaneous bursting in  
793 hippocampal pyramidal neurons. Cell Mol Neurobiol 1:325-334.

794

795 Hafting T, Fyhn M, Molden S, Moser MB, Moser EI (2005) Microstructure of a spatial map  
796 in the entorhinal cortex. Nature 436:801-806.

797

798 Hamam BN, Kennedy TE, Alonso A, Amaral DG (2000) Morphological and  
799 electrophysiological characteristics of layer V neurons of the rat medial entorhinal cortex.  
800 J Comp Neurol 418:457-472.

801

802 Hamam BN, Amaral DG, Alonso AA (2002) Morphological and electrophysiological  
803 characteristics of layer V neurons of the rat lateral entorhinal cortex. J Comp Neurol  
804 451:45-61.

805

806 Hamilton DJ, Wheeler DW, White CM, Rees CL, Komendantov AO, Bergamino M, Ascoli  
807 GA (2017) Name-calling in the hippocampus (and beyond): coming to terms with neuron  
808 types and properties. Brain Inform 4:1-12.

809

810 Han ZS, Buhl EH, Lörinczi Z, Somogyi P (1993) A high degree of spatial selectivity in the  
811 axonal and dendritic domains of physiologically identified local-circuit neurons in the  
812 dentate gyrus of the rat hippocampus. *Eur J Neurosci* 5:395-410.

813

814 Hasselmo ME (2014) Neuronal rebound spiking, resonance frequency and theta cycle  
815 skipping may contribute to grid cell firing in medial entorhinal cortex. *Phil Trans R Soc B*  
816 369: 20120523. doi:10.1098/rstb.2012.0523

817

818 Häusser M, Spruston N, Stuart GJ (2000) Diversity and dynamics of dendritic signaling.  
819 *Science* 290:739-744.

820

821 Hayward LF, Felder RB (1999) Electrophysiological properties of rat lateral parabrachial  
822 neurons in vitro. *Am J Physiol* 276:R696-R706.

823

824 Hemond P, Epstein D, Boley A, Migliore M, Ascoli GA, Jaffe DB (2008) Distinct classes  
825 of pyramidal cells exhibit mutually exclusive firing patterns in hippocampal area CA3b.  
826 *Hippocampus* 18:411-424.

827

828 Izhikevich EM, Desai NS, Walcott EC, Hoppensteadt FC (2003) Bursts as a unit of neural  
829 information: selective communication via resonance. *Trends Neurosci* 26(3):161-167.

830

831 Jonas P, Bischofberger J, Fricker D, Miles R (2004) Interneuron diversity series: fast in,  
832 fast out-temporal and spatial signal processing in hippocampal interneurons. *Trends*  
833 *Neurosci* 27:30-40.

834

835 Kandel ER, Markram H, Matthews PM, Yuste R, Koch C (2013) Neuroscience thinks big  
836 (and collaboratively). *Nat Rev Neurosci* 14:659-664.

837

838 Kirson ED, Yaari Y (2000) Unique properties of NMDA receptors enhance synaptic  
839 excitation of radiatum giant cells in rat hippocampus. *J Neurosci* 20:4844-4854.

840

841 Komendantov AO, Ascoli GA (2009) Dendritic excitability and neuronal morphology as  
842 determinants of synaptic efficacy. *J Neurophysiol* 2009 101:1847-166.

843

844 Krichmar JL, Velasquez D, Ascoli GA (2006) Effects of beta-catenin on dendritic  
845 morphology and simulated firing patterns in cultured hippocampal neurons. *Biol Bull*  
846 211:31-43.

847

848 Kumar SS, Buckmaster PS (2006) Hyperexcitability, interneurons, and loss of GABAergic  
849 synapses in entorhinal cortex in a model of temporal lobe epilepsy. *J Neurosci* 26:4613-  
850 4623.

851

852 Lee SY, Földy C, Szabadics J, Soltesz I (2011) Cell-type-specific CCK2 receptor signaling  
853 underlies the cholecystinin-mediated selective excitation of hippocampal parvalbumin-  
854 positive fast-spiking basket cells. *J Neurosci* 31:10993-11002.

855

856 Leroy F, Lamotte d'Incamps B, Imhoff-Manuel RD, Zytnicki D (2014) Early intrinsic  
857 hyperexcitability does not contribute to motoneuron degeneration in amyotrophic lateral  
858 sclerosis. *eLife* 3:e04046 doi: 10.7554/eLife.04046.

859

860 Lien CC, Jonas P (2003) Kv3 potassium conductance is necessary and kinetically  
861 optimized for high-frequency action potential generation in hippocampal interneurons. *J*  
862 *Neurosci* 23:2058-2068.

863

864 Lisman JE (1997) Bursts as a unit of neural information: making unreliable synapses  
865 reliable. *Trends Neurosci* 20:38-43.

866

867 Llinás RR. (1988) The intrinsic electrophysiological properties of mammalian neurons:  
868 insights into central nervous system function. *Science* 242:1654-1664.

869

870 London M, Schreibman A, Häusser M, Larkum ME, Segev I (2002) The information  
871 efficacy of a synapse. *Nat Neurosci* 5:332-340.

872

873 Lübke J, Frotscher M, Spruston N (1998) Specialized electrophysiological properties of  
874 anatomically identified neurons in the hilar region of the rat fascia dentata. *J Neurophysiol*  
875 79:1518-1534.

876

877 Lydersen S, MW Fagerland MF, Laake P (2009) Recommended tests for association in  
878  $2 \times 2$  tables. *Statistics in Medicine* 28:1159-1175.

879

880 Mainen ZF, Sejnowski TJ (1996) Influence of dendritic structure on firing pattern in model  
881 neocortical neurons. *Nature* 382:363-366.

882

883 Masukawa LM, Benardo LS, Prince DA (1982) Variations in electrophysiological  
884 properties of hippocampal neurons in different subfields. *Brain Res* 242: 341–344.

885

886 Markram H, Toledo-Rodriguez M, Wang Y, Gupta A, Silberberg G, Wu C (2004)  
887 Interneurons of the neocortical inhibitory system. *Nat Rev Neurosci* 5:793-807.

888

889 Markram H, Muller E, Ramaswamy S, Reimann MW, Abdellah M, Sanchez CA, Ailamaki  
890 A, Alonso-Nanclares L, Antille N, Arsever S, Kahou GA, Berger TK, Bilgili A, Buncic N,  
891 Chalimourda A, Chindemi G, Courcol JD, Delalondre F, Delattre V, Druckmann S,  
892 Dumusc R, Dynes J, Eilemann S, Gal E, Gevaert ME, Ghobril JP, Gidon A, Graham JW,  
893 Gupta A, Haenel V, Hay E, Heinis T, Hernando JB, Hines M, Kanari L, Keller D, Kenyon  
894 J, Khazen G, Kim Y, King JG, Kisvarday Z, Kumbhar P, Lasserre S, Le Bé JV, Magalhães  
895 BR, Merchán-Pérez A, Meystre J, Morrice BR, Muller J, Muñoz-Céspedes A, Muralidhar  
896 S, Muthurasa K, Nachbaur D, Newton TH, Nolte M, Ovcharenko A, Palacios J, Pastor L,  
897 Perin R, Ranjan R, Riachi I, Rodríguez JR, Riquelme JL, Rössert C, Sfyraakis K, Shi Y,  
898 Shillcock JC, Silberberg G, Silva R, Tauheed F, Telefont M, Toledo-Rodriguez M,  
899 Tränkler T, Van Geit W, Díaz JV, Walker R, Wang Y, Zaninetta SM, DeFelipe J, Hill SL,  
900 Segev I, Schürmann F (2015) Reconstruction and Simulation of Neocortical  
901 Microcircuitry. *Cell* 163:456-492.

902

903 McCormick DA, Connors BW, Lighthall JW, Prince DA (1985) Comparative  
904 electrophysiology of pyramidal and sparsely spiny stellate neurons of the  
905 neocortex. *J Neurophysiol* 54:782-806.

906

907 McNaughton BL, Barnes CA, O'Keefe J (1983) The contributions of position, direction,  
908 and velocity to single unit activity in the hippocampus of freely-moving rats. *Exp Brain*  
909 *Res* 52:41-49.

910

911 Mercer A, Trigg HL, Thomson AM (2007) Characterization of neurons in the CA2 subfield  
912 of the adult rat hippocampus. *J Neurosci* 27:7329-7338.

913

914 Mercer A, Botcher NA, Eastlake K, Thomson AM (2012) SP-SR interneurons: a novel  
915 class of neurones of the CA2 region of the hippocampus. *Hippocampus* 22:1758-1769.

916

917 Migliore M, Shepherd GM. (2005) Opinion: an integrated approach to classifying neuronal  
918 phenotypes. *Nat Rev Neurosci* 6:810-818.

919

920 Migliore R, Lupascu CA, Bologna LL, Romani A, Courcol JD, Antonel S, Van Geit WAH,  
921 Thomson AM, Mercer A, Lange S, Falck J, Rössert CA, Shi Y, Hagens O, Pezzoli M,  
922 Freund TF, Kali S, Muller EB, Schürmann F, Markram H, Migliore M (2018) The  
923 physiological variability of channel density in hippocampal CA1 pyramidal cells and  
924 interneurons explored using a unified data-driven modeling workflow. *PLoS Comput Biol*  
925 doi: 10.1371/journal.pcbi.1006423.

926



927 Mott DD, Turner DA, Okazaki MM, Lewis DV (1997) Interneurons of the dentate-hilus  
928 border of the rat dentate gyrus: morphological and electrophysiological heterogeneity. *J*  
929 *Neurosci* 17:3990-4005.

930

931 Neubrandt M, Oláh VJ, Brunner J, Marosi EL, Soltesz I, Szabadics J (2018) Single bursts  
932 of individual granule cells functionally rearrange feedforward inhibition. *J Neurosci*  
933 38:1711-1724.

934

935 O'Keefe J, Dostrovsky J (1971) The hippocampus as a spatial map. Preliminary evidence  
936 from unit activity in the freely-moving rat. *Brain Res* 34:171-175.

937

938 Pawelzik H, Hughes DI, Thomson AM (2002) Physiological and morphological diversity  
939 of immunocytochemically defined parvalbumin- and cholecystokinin-positive  
940 interneurons in CA1 of the adult rat hippocampus. *J Comp Neurol* 443:346-367.

941

942 Petilla Interneuron Nomenclature Group., Ascoli GA, Alonso-Nanclares L, Anderson SA,  
943 Barrionuevo G, Benavides-Piccione R, Burkhalter A, Buzsáki G, Cauli B, Defelipe J,  
944 Fairén A, Feldmeyer D, Fishell G, Fregnac Y, Freund TF, Gardner D, Gardner EP,  
945 Goldberg JH, Helmstaedter M, Hestrin S, Karube F, Kisvárdy ZF, Lambolez B, Lewis  
946 DA, Marin O, Markram H, Muñoz A, Packer A, Petersen CC, Rockland KS, Rossier J,

947 Rudy B, Somogyi P, Staiger JF, Tamas G, Thomson AM, Toledo-Rodriguez M, Wang Y,  
948 West DC, Yuste R (2008) Petilla terminology: nomenclature of features of GABAergic  
949 interneurons of the cerebral cortex. *Nat Rev Neurosci* 9:557-568.

950

951 Price CJ, Cauli B, Kovacs ER, Kulik A, Lambolez B, Shigemoto R, Capogna M (2005)

952 Neurogliaform neurons form a novel inhibitory network in the hippocampal CA1

953 area. *J Neurosci* 25:6775-6786.

954

955 Rees CL, Wheeler DW, Hamilton DJ, White CM, Komendantov AO, Ascoli GA (2016)

956 Graph theoretic and motif analyses of the hippocampal neuron type potential  
957 connectome. *eNeuro* 3. pii: ENEURO.0205-16.2016.

958

959 Rinzel J, Ermentrout GB (1998) Analysis of neural excitability and oscillations. In: Koch  
960 C, Segev I, editors. *Methods in neuronal modeling: From ions to networks*. 2nd edition.  
961 Cambridge (Massachusetts): MIT Press. pp. 251–291.

962

963 Rudy B, McBain CJ (2001) Kv3 channels: voltage-gated K<sup>+</sup> channels designed for

964 high-frequency repetitive firing. *Trends Neurosci* 24:517-526.

965

966 Rudy JW, Sutherland RJ (1989) Configural association theory: The role of the  
967 hippocampal formation in learning, memory, and amnesia. *Psychobiology* 17: 129–144.

968

969 Rudy JW, Sutherland RJ (1995) Configural association theory and the hippocampal  
970 formation: an appraisal and reconfiguration. *Hippocampus* 5:375-389.

971

972 Savanthrapadian S, Meyer T, Elgueta C, Booker SA, Vida I, Bartos M (2014) Synaptic  
973 properties of SOM- and CCK-expressing cells in dentate gyrus interneuron networks. *J*  
974 *Neurosci* 34:8197-8209.

975

976 Sciamanna G, Wilson CJ (2011) The ionic mechanism of gamma resonance in rat striatal  
977 fast-spiking neurons. *J Neurophysiol* 106:2936-2949.

978

979 Sik A, Ylinen A, Penttonen M, Buzsáki G (1994) Inhibitory CA1-CA3-hilar region feedback  
980 in the hippocampus. *Science* 265:1722-1724.

981

982 Sik A, Penttonen M, Ylinen A, Buzsáki G (1995) Hippocampal CA1 interneurons: an in  
983 vivo intracellular labeling study. *J Neurosci* 15:6651-6665.

984

- 985 Smith M, Perrier JF (2006) Intrinsic properties shape the firing pattern of ventral horn  
986 interneurons from the spinal cord of the adult turtle. *J Neurophysiol* 96:2670-2677.
- 987
- 988 Song C, Xu XB, He Y, Liu ZP, Wang M, Zhang X, Li BM, Pan BX (2013) Stuttering  
989 interneurons generate fast and robust inhibition onto projection neurons with low capacity  
990 of short term modulation in mouse lateral amygdala. *PLoS One* 8:e60154.
- 991
- 992 Spruston N, Lübke J, Frotscher M (1997) Interneurons in the stratum lucidum of the rat  
993 hippocampus: an anatomical and electrophysiological characterization. *J Comp Neurol*  
994 385:427-440.
- 995
- 996 Staff NP, Jung HY, Thiagarajan T, Yao M, Spruston N (2000) Resting and active  
997 properties of pyramidal neurons in subiculum and CA1 of rat hippocampus. *J*  
998 *Neurophysiol* 84:2398-2408.
- 999
- 1000 Szabadics J and Soltesz I (2009) Functional specificity of mossy fiber innervation of  
1001 GABAergic cells in the hippocampus. *J Neurosci* 29:4239-4251.
- 1002
- 1003 Tamas G, Lorincz A, Simon A, Szabadics J (2003) Identified sources and targets of slow  
1004 inhibition in the neocortex. *Science* 299:1902-1905.

1005

1006 Tebaykin D, Tripathy SJ, Binnion N, Li B, Gerkin RC, Pavlidis P (2018) Modeling sources  
1007 of interlaboratory variability in electrophysiological properties of mammalian neurons. *J*  
1008 *Neurophysiol* 119:1329-1339.

1009

1010 Teeter C, Iyer R, Menon V, Gouwens N, Feng D, Berg J, Szafer A, Cain N, Zeng H,  
1011 Hawrylycz M, Koch C, Mihalas S (2018). Generalized leaky integrate-and-fire models  
1012 classify multiple neuron types. *Nat Commun* 9:709.

1013

1014 Tripathy SJ, Burton SD, Geramita M, Gerkin RC, Urban NN (2015) Brain-wide analysis  
1015 of electrophysiological diversity yields novel categorization of mammalian neuron types.  
1016 *J Neurophysiol* 113:3474-3489.

1017

1018 Tricoire L, Pelkey KA, Erkkila BE, Jeffries BW, Yuan X, McBain CJ (2001) A blueprint for  
1019 the spatiotemporal origins of mouse hippocampal interneuron diversity. *J Neurosci*  
1020 31:10948-10970.

1021

1022 Venkadesh S, Komendantov AO, Listopad S, Scott EO, De Jong K, Krichmar JL, Ascoli  
1023 GA (2018) Evolving simple models of diverse intrinsic dynamics in hippocampal neuron  
1024 types. *Front Neuroinform* 12:8. doi:10.3389/fninf.2018.00008.

1025

1026 Vida I, Halasy K, Szinyei C, Somogyi P, Buhl EH (1998) Unitary IPSPs evoked by  
1027 interneurons at the stratum radiatum-stratum lacunosum-moleculare border in the CA1  
1028 area of the rat hippocampus in vitro. *J Physiol* 506:755-773.

1029

1030 Williams PA, Larimer P, Gao Y, Strowbridge BW (2007) Semilunar granule cells:  
1031 glutamatergic neurons in the rat dentate gyrus with axon collaterals in the inner molecular  
1032 layer. *J Neurosci* 27:13756 –1376.

1033

1034 Wheeler DW, White CM, Rees CL, Komendantov AO, Hamilton DJ, Ascoli GA (2015)  
1035 Hippocampome.org: a knowledge base of neuron types in the rodent hippocampus. *eLife*  
1036 4:e09960. doi: 10.7554/eLife.09960.

1037

1038 Xu J, Clancy CE (2008) Ionic mechanisms of endogenous bursting in CA3 hippocampal  
1039 pyramidal neurons: a model study. *PLoS One* 3:e2056.  
1040 doi:10.1371/journal.pone.0002056.

1041

1042 Xu W, Morishita W, Buckmaster PS, Pang ZP, Malenka RC, Südhof TC (2012) Distinct  
1043 neuronal coding schemes in memory revealed by selective erasure of fast synchronous  
1044 synaptic transmission. *Neuron* 73:990-1001.

1045

1046 Zemankovics R, Káli S, Paulsen O, Freund TF, Hájos N (2010) Differences in  
1047 subthreshold resonance of hippocampal pyramidal cells and interneurons: the role of h-  
1048 current and passive membrane characteristics. *J Physiol* 588:2109-2132.

1049

1050 Zhao ML, Wu CF (1997) Alterations in frequency coding and activity dependence of  
1051 excitability in cultured neurons of *Drosophila* memory mutants. *J Neurosci* 17:2187-2199.

1052

1053

## 1054 **Legends**

1055 **Figure 1.** Firing pattern elements observable in hippocampal neurons *in vitro*. ISI - inter-  
1056 spike interval, PFS – post firing silence, sDW – slow depolarization wave, sAHP – slow  
1057 after-hyperpolarization. Original data extracted from Lübke et al. (1998) (D), Vida et al.  
1058 (1998) (ASP), Pawelzik et al. (2002) (RASP), Hamam et al. (2002) (TSTUT), Chevaleyre  
1059 and Seigelbaum (2010) (TSWB), Mercer et al. (2012) (SLN), Mott et al. (1997) (NASP),  
1060 Fuentealba et al. (2010) (PSTUT), and Golomb et al. (2006) (PSWB, spontaneous  
1061 bursting in Ca<sup>2+</sup>-free ACSF).

1062

1063 **Figure 2.** Examples of fitting of spiking activity with linear regression and piecewise  
1064 linear regression models. **A.** Responses to current injection of a DG aspiny interneuron

1065 with axonal projection to the inner molecular layer (AIPRIM in Hippocampome.org)  
1066 (Original data extracted from Lübke et al., 1998). **B.** Fitting of digitized experimental  
1067 data with different models.

1068 1 parameter fit is a constant function  $Y=2.78$ ;

1069 2 parameter fit is a linear function  $Y=0.017X+1.67$ ;

1070 3 parameter fit is a piecewise linear function  $Y = \begin{cases} 0.031X + 1.27 & \text{if } X < 74.9 \\ 3.58 & \text{if } X \geq 74.9 \end{cases}$  ;

1071 4 parameter fit is a piecewise linear function  $Y = \begin{cases} 0.033X + 1.23 & \text{if } X < 61.3 \\ 0.006X + 2.87 & \text{if } X \geq 61.3 \end{cases}$  .

1072 Based on  $p$ -values, the firing pattern was identified as adapting-non-adapting spiking  
1073 (ASP.NASP):  $p_{2,1} < 0.05$  ( $p_{2,1}=1.26 \cdot 10^{-10}$ ),  $p_{3,2} < 0.025$  ( $p_{3,2}=2.7 \cdot 10^{-3}$ ),  $p_{4,3} > 0.016$   
1074 ( $p_{4,3}=5.5 \cdot 10^{-2}$ ).  $p_{2,1}$ ,  $p_{3,2}$ ,  $p_{4,3}$  –  $p$ -values of differences between 2 parameter fit and 1  
1075 parameter fit, 3 parameter fit and 2 parameter fit, 4 parameter fit and 3 parameter fit,  
1076 respectively.

1077

1078 **Figure 3.** Flow chart of general procedure for firing pattern identification. See text for  
1079 abbreviations. Source code and executable of Java implementation available at  
1080 [github.com/Hippocampome-Org/NeuroSpikePatterns](https://github.com/Hippocampome-Org/NeuroSpikePatterns).

1081



1082 **Figure 4.** Identified firing patterns and firing pattern phenotypes complexity of neuron  
1083 types (**A**) and subtypes (**B**). Online matrix: [hippocampome.org/firing\\_patterns](http://hippocampome.org/firing_patterns). Green  
1084 and red cell type/subtype names denote excitatory (e) and inhibitory (i) neurons,  
1085 respectively. FPP is firing pattern phenotype. The numbers in the brackets correspond  
1086 to the order in which the cell types were presented in the Hippocampome (ver. 1.3). The  
1087 orange asterisk denotes different experimental conditions. **C.** Complexity of firing  
1088 pattern phenotypes; percentages and ratios indicate occurrences of phenotypes of  
1089 different complexity among 120 cell types/subtypes.

1090

1091 **Figure 5.** Occurrence of firing patterns, firing pattern elements and firing pattern  
1092 phenotypes among the hippocampal formation neuron types. **A.** Distribution of 23 firing  
1093 patterns; total numbers are shown above the bars. **B.** Distribution of 9 firing pattern  
1094 elements; total numbers are in parentheses below and percentages of occurrence among  
1095 90 cell types are above the bars. **C.** Relationships between firing pattern elements in the  
1096 firing patterns of hippocampal neuron types. Numbers of cell types with distinctive firing  
1097 patterns are indicated.

1098

1099 **Figure 6.** Ten firing pattern phenotype families from 120 neuron types/subtypes. **A.**  
1100 Hierarchical tree resulting from two-step clustering of weighted firing pattern elements  
1101 with representative examples of cell types/subtypes which belong to corresponding firing  
1102 pattern phenotype family. Simple adapting firing pattern phenotype is not unique (see  
1103 *Results*). **B.** Percentage of occurrence of firing pattern elements in families of firing

1104 pattern phenotypes. **C.** Relative proportions of firing pattern phenotypes among neuron  
1105 types/subtypes. Green and red numbers represent excitatory and inhibitory cell  
1106 types/subtypes as enumerated in Fig. 4. **D.** Distribution of firing pattern phenotypes in  
1107 sub-regions of the hippocampal formation. FPP% is percentage of expression of firing  
1108 pattern phenotypes.

1109

1110 **Figure 7.** Hippocampome.org enables searching neuron types by neurotransmitter; axon,  
1111 dendrite, and soma locations; molecular expression; electrophysiological parameters;  
1112 input/output connectivity; firing patterns, and firing pattern parameters. **A.** Sample query  
1113 for calbindin-negative neuron types with axons in CA1 stratum pyramidale,  $AP_{width} < 0.8$   
1114 ms, PSTUT firing, and ratio of maximum ISI to the next ISI greater than 4.8. Numbers in  
1115 parentheses indicate the number of neuron types with the selected property or specific  
1116 combination of properties. **B.** Search results are linked to the neuron page(s). **C.** The  
1117 neuron page is linked to the firing pattern evidence page. Original data extracted from  
1118 Pawelzik et al., 2002. **D-H.** All firing patterns parameters (**D**), experimental details  
1119 including information about animals (**E**), preparations (**F**), recording method and intra-  
1120 pipette solution (**G**), as well as ACSF composition (**H**) can be displayed. **I.** Downloadable  
1121 comma-separated-value file of inter-spike intervals.

1122

1123 **Figure 8.** Relationships between the width of action potentials ( $AP_{width}$ ) and minimum of  
1124 inter-spike intervals ( $ISI_{min}$ ) for 84 neuron types and subtypes. **A.**  $AP_{width}$  -  $ISI_{min}$  scatter  
1125 diagram with results of linear regression. Green triangles and red circles indicate

1126 excitatory and inhibitory neurons, respectively. Dashed orange lines: horizontal line  
1127 separates neurons with slow spikes from neurons with fast and moderate spikes; vertical  
1128 lines ( $w1$  and  $w2$ ) separate neurons with narrow, medium and wide action potentials.  
1129 Black lines: solid line shows linear fitting for slow spike neurons with a function  $Y = -$   
1130  $26.72X + 76.42$  ( $R^2=0.83$ ); dashed line shows general linear fitting for fast and moderate  
1131 spike neurons with a function  $Y = 13.79X - 0.05$  ( $R^2=0.52$ ). **B.**  $AP_{width}$  histogram. **C.** ISI  
1132 histogram.

1133

1134 **Table 1. Abbreviations:** Pct. – percentage of firing pattern recordings for which this  
1135 solution was used.

1136

1137 **Table 2. Abbreviations:** KAc – potassium acetate ( $KCH_3COO$ ); KGlu – potassium  
1138 gluconate;  $KMeSO_4$  – potassium methylsulphate ( $CH_3KSO_4$ ); PCr – phosphocreatine;  
1139 Pct. – percentage of firing pattern recordings for which this solution was used; 10 mM  
1140 HEPES (4-(2-hydroxyethyl)-1-piperazineethanesulfonic acid) was used in all patch  
1141 pipette solutions. Asterisks indicate examples of micropipette solutions.

1142

1143 **Table 3. Abbreviations:**  $a_1$  – slope of linear fitting for normalized ISIs vs normalized  
1144 time;  $DF$  – delay factor;  $f_{min}$  – minimum frequency of stuttering or bursting;  $F_{pre}$ ,  $F_{post}$ ,  
1145  $F_{PSTUT}$ ,  $F_{PSWB}$  – ISI comparison factors,  $ISI_{max}$  – maximum inter-spike interval;  $p_{2,1}$  –  $p$ -  
1146 value for differences between two- and one-parameter linear fitting;  $p_{3,2}$  –  $p$ -value for

1147 differences between three- and two-parameter linear fitting; *PFS* – post firing silence;  
1148 *SF* – silence factor;  $S_{RASP}$  – slope of linear fitting of rapid transient; *SWA* – slow wave  
1149 amplitude;  $SWA_{\min}$  – minimum slow wave amplitude.

1150

1151 **Table 4. NASP** – HICAP (Mott et al. 1997, Fig. 11A); **PSTUT** - CA1 Neurogliaform  
1152 (Fuentelba et al. 2010, Fig.5B); **PSWB** - CA3 Pyramidal (Bilkey and Schwartzkroin 1990,  
1153 Fig. 1a); **ASP.NASP** - CA3 Basket-CCK (Gulyás et al. 2010, Fig. 1b, right); **ASP.SLN** –  
1154 EC MEC LV Pyramidal (Canto and Witter 2012b, Fig.10C7); **RASP.NASP** – EC LV Deep  
1155 Pyramidal (Hamam et al. 2000, Fig.3C); **RASP.SLN** – CA1 Radiatum Giant (Bullis et al.  
1156 2007, Fig.5A); **TSTUT.NASP** - EC LV Deep Pyramidal (Hamam et al. 2002, Fig.5E);  
1157 **TSTUT.PSTUT** - CA1 (Price et al. 2005, Fig.3A2); **TSUT.SLN** – CA2 SP-SR (Mercer et al.  
1158 2012; Fig. 3A); **TSWB.NASP** - CA1 Pyramidal (Zemankovics et al. 2009, Fig.  
1159 1B); **TSWB.SLN** - CA3 Pyramidal (Hemond et al. 2008, Fig. 4); **D.NASP** – DG  
1160 Neurogliaform (Armstrong et al. 2011, Fig.3A, top trace); **D.PSTUT** - CA2 Basket (Mercer  
1161 et al. 2007, Fig. 5B); **D.PSWB** - cultured *rutabaga* mutant giant neuron of *Drosophila*  
1162 (Zhao and Wu 1997, Fig.7, *top left*); **D.ASP.SLN** - neuron in external lateral subnucleus of  
1163 lateral parabrachial nucleus (Hayward and Felder 1999, Fig.3A, top); **D.RASP.NASP** -  
1164 CA3 LMR-Targeting (Ascoli et al. 2009, Fig. 1A); **D.TSUT.SLN** - striatal fast-spiking neuron  
1165 (Sciamanna and Wilson 2011, Fig. 1C); **D.TSWB.NASP** - CA1 Axo-Axonic (Buhl et al.  
1166 1994, Fig. 5D). **Abbreviations:** Lat. – lateral; nucl. – nucleus.

1167

1168 **Illustrations and Tables**

1169 **Table 1.** Representative examples of artificial cerebrospinal fluids

| NaCl (mM) | KCl (mM) | CaCl <sub>2</sub> (mM) | NaH <sub>2</sub> PO <sub>4</sub> (mM) | KH <sub>2</sub> PO <sub>4</sub> (mM) | MgCl <sub>2</sub> (mM) | MgSO <sub>4</sub> (mM) | NaHCO <sub>3</sub> (mM) | Glucose (mM) | t (° C) | Pct.   | Sample Reference         |
|-----------|----------|------------------------|---------------------------------------|--------------------------------------|------------------------|------------------------|-------------------------|--------------|---------|--------|--------------------------|
| 126       | 3        | 2                      | 1.25                                  |                                      |                        | 2                      | 26                      | 10           | 34      | 30.0 % | Canto and Witter, 2012a  |
| 124       | 3.3      | 2.5                    |                                       | 1.2                                  |                        | 1                      | 25.5                    | 15           | 34-35   | 11.3 % | Ali and Thomson, 1998    |
| 120       | 3.3      | 1.8                    | 1.23                                  |                                      |                        | 1.2                    | 25                      | 10           | 32-34   | 6.9%   | Mott et al, 1997         |
| 130       | 3.5      | 2.5                    | 1.25                                  |                                      | 1.5                    |                        | 24                      | 10           | 32-34   | 6.5%   | Tricoire et al, 2011     |
| 126       | 2.5      | 2                      | 1.25                                  |                                      | 2                      |                        | 26                      | 10           | 34-37   | 6.5%   | Zemankovics et al., 2010 |
| 126       | 3        | 2                      | 1.25                                  |                                      |                        | 2                      | 24                      | 10           | 34-35   | 5.3%   | Buhl et al., 1994        |
| 125       | 2.5      | 2                      | 1.25                                  |                                      | 1                      |                        | 25                      | 25           | 35-37   | 4.5%   | Lübke et al., 1998       |
| 124       | 5        | 2                      | 1.25                                  |                                      |                        | 2                      | 26                      | 10           | 33-35   | 2.8%   | Hamam et al., 2002       |
| 124       | 3        | 2.5                    | 1.23                                  |                                      |                        | 1.2                    | 26                      | 10           | 30      | 2.0%   | Williams et al., 2007    |

1170

1171 **Table 2.** Representative examples of solutions for patch pipette and micropipette filling

| KMeSO <sub>4</sub> (mM) | KAc (mM) | KGlu (mM) | KCl (mM) | NaCl (mM) | MgCl <sub>2</sub> (mM) | EGTA (mM) | Mg-ATP (mM) | Na <sub>2</sub> -ATP (mM) | GTP/ Na <sub>1-3</sub> -GTP (mM) | PCr/ Na-PCr (mM) | Biocytin (%) | Lucifer yellow (%) | Pct.  | Sample Reference        |
|-------------------------|----------|-----------|----------|-----------|------------------------|-----------|-------------|---------------------------|----------------------------------|------------------|--------------|--------------------|-------|-------------------------|
|                         |          | 110       | 10       |           |                        |           | 4           |                           | 0.3                              | 10               | 0.5          |                    | 29.1% | Canto and Witter, 2012a |
|                         |          | 130       | 7        |           |                        |           | 2           |                           | 0.3                              |                  | 0.2-0.4      |                    | 6.9%  | Mott et al, 1997        |
|                         |          | 150       |          |           | 3                      | 0.5       | 2           |                           | 0.3                              |                  | 0.2          |                    | 6.5%  | Tricoire et al, 20115   |
|                         |          | 126       |          |           |                        |           | 4           |                           | 0.3                              | 10               | 0.5          |                    | 4.9%  | Price et al., 2005      |
|                         |          | 90        | 27.4     | 1.8       | 1.7                    | 0.05      | 2           |                           | 0.4                              | 10               | 0.03         |                    | 2.8%  | Armstrong et al., 2011  |
|                         |          | 120       | 20       |           | 2                      | 0.1       |             | 2                         | 0.3                              |                  | 0.5          |                    | 2.0%  | Hemond et al., 2008     |
| 140                     |          |           |          | 4         |                        | 0.2       | 4           |                           | 0.3                              | 10               |              |                    | 2.0%  | Williams et al., 2007 * |
| 2000                    |          |           |          |           |                        |           |             |                           |                                  |                  | 2            |                    | 11.3% | Ali and Thomson, 1998 * |
| 1500                    |          |           |          |           |                        |           |             |                           |                                  |                  | 2            |                    | 5.3%  | Buhl et al., 1994 *     |
|                         | 1000     |           |          |           |                        |           |             |                           |                                  |                  | 3            |                    | 3.2%  | Sik et al., 1995 *      |
|                         | 4000     | 10        |          |           |                        |           |             |                           |                                  |                  |              | 4                  | 2.8%  | Lacaille et al., 1987 * |

1172

1173 **Table 3.** Principles of classification of firing pattern elements

| Firing pattern element | Transient responses              | Steady-state responses | Characteristics of responses                                                                                          | Values of parameters                                   |
|------------------------|----------------------------------|------------------------|-----------------------------------------------------------------------------------------------------------------------|--------------------------------------------------------|
| Silence                | Delayed (D.)                     |                        | $Delay > DF \frac{ISI_1 + ISI_2}{2}$                                                                                  | $DF = 2$                                               |
|                        |                                  | SiLeNce (SLN)          | $PFS > SF \frac{ISI_n + ISI_{n-1}}{2}$<br>$PFS > SF * ISI_{max}$                                                      | $SF = 2$                                               |
| Spiking                | Adapting Spiking (ASP.)          |                        | $ISI_1 < ISI_2 < ISI_n$ ; to compare 2 parameter fit ( $Y=a_1X+b_1$ ) and 3 parameter fit ( $Y=a_1X+b_1$ ; $Y= b_2$ ) | $p_{2,1} < 0.05$<br>$p_{3,2} > 0.025$<br>$a_1 > 0.003$ |
|                        | Rapidly Adapting Spiking (RASP.) |                        | $ISI_1 \ll ISI_2 \ll ISI_3$<br>$Y = a_1X + b_1$<br>$a_1 > S_{RASP}$                                                   | $S_{RASP} = 0.2$                                       |

|             |                    |                                      |                                                                                                                                                                                                       |                                                                                     |
|-------------|--------------------|--------------------------------------|-------------------------------------------------------------------------------------------------------------------------------------------------------------------------------------------------------|-------------------------------------------------------------------------------------|
|             |                    | Non-Adapting Spiking (NASP)          | $ISI_1 \approx ISI_2 \dots \approx ISI_n;$<br>to compare 1 parameter fit ( $Y=b_1$ ) and 2 parameter fit ( $Y=a_1X+b_1$ )                                                                             | $p_{2,1} > 0.05$                                                                    |
| Interrupted | Stuttering         | Transient STUTering (TSTUT.)         | $ISI_i > F_{pre} * ISI_{i-1}$<br>$ISI_i > F_{post} * ISI_{i+1}$<br>$\frac{\sum_{j=i}^n ISI_j}{n-j} > F_{pre} \frac{\sum_{j=1}^{i-1} ISI_j}{j}$ (T1.1)<br>$\forall j < i-1: \frac{1}{ISI_j} > f_{min}$ | $F_{pre}=2.5$<br>$F_{post}=1.5$<br>$f_{min}=25$ Hz<br>$i=2,3,4$                     |
|             |                    | Persistent STUTering (PSTUT)         | $\frac{ISI_i^{max}}{ISI_{i-1}} + \frac{ISI_i^{max}}{ISI_{i+1}} > F_{PSTUT}$                                                                                                                           | $F_{PSTUT}=5$                                                                       |
|             | Slow-Wave Bursting | Transient Slow-Wave Bursting (TSWB.) | Inequalities T1.1,<br>$SWA > SWA_{min}$                                                                                                                                                               | $F_{pre}=2.5$<br>$F_{post}=1.5$<br>$f_{min}=25$ Hz<br>$i=2,3,4$<br>$SWA_{min}=5$ mV |
|             |                    | Persistent Slow-Wave                 | $\frac{ISI_i^{max}}{ISI_{i-1}} + \frac{ISI_i^{max}}{ISI_{i+1}} > F_{PSWB}$                                                                                                                            | $F_{PSWB}=5$<br>$SWA_{min}=5$ mV                                                    |



|  |  |  |                    |                    |  |
|--|--|--|--------------------|--------------------|--|
|  |  |  | Bursting<br>(PSWB) | $SWA > SWA_{\min}$ |  |
|--|--|--|--------------------|--------------------|--|

1174

1175

1176

1177

1178

1179

1180

1181

1182

1183

1184

1185

1186

1187

1188

1189

1190

1191

1192

1193

1194 **Table 4.** Occurrences of completed firing patterns in hippocampal and other neurons

|                   |          | Steady States |                                           |                                    |                                          |                                             |
|-------------------|----------|---------------|-------------------------------------------|------------------------------------|------------------------------------------|---------------------------------------------|
|                   |          | NASP          | PSTUT                                     | PSWB                               | SLN                                      |                                             |
| <b>Transients</b> | -        | -             | <b>NASP</b><br>DG HICAP                   | <b>PSTUT</b><br>CA1 Neurogliaform  | <b>PSWB</b><br>CA3 Pyramidal             | —                                           |
|                   | -        | <b>ASP</b>    | <b>ASP.NASP</b><br>CA3 Basket-CCK         | <b>ASP.PSTUT</b>                   | <b>ASP.PSWB</b>                          | <b>ASP.SLN</b><br>EC MEC LV Pyramidal       |
|                   | -        | <b>RASP</b>   | <b>RASP.NASP</b><br>EC LV Deep Pyramidal  | <b>RASP.PSTUT</b>                  | <b>RASP.PSWB</b>                         | <b>RASP.SLN</b><br>CA1 Radiatum Giant       |
|                   | -        | <b>TSTUT</b>  | <b>TSTUT.NASP</b><br>EC LV Deep Pyramidal | <b>TSTUT.PSTUT</b>                 | <b>TSTUT.PSWB</b>                        | <b>TSTUT.SLN</b><br>CA2 SP-SR               |
|                   | -        | <b>TSWB</b>   | <b>TSWB.NASP</b><br>CA1 Pyramidal         | <b>TSWB.PSTUT</b>                  | <b>TSWB.PSWB</b>                         | <b>TSWB.SLN</b><br>CA3 Pyramidal            |
|                   | <b>D</b> | -             | <b>D.NASP</b><br>DG Neurogliaform         | <b>D.PSTUT</b><br>CA1 Bistratified | <b>D.PSWB</b><br><i>Drosophila</i> giant | —                                           |
|                   | <b>D</b> | <b>ASP</b>    | <b>D.ASP.NASP</b>                         | <b>D.ASP.PSTUT</b>                 | <b>D.ASP.PSWB</b>                        | <b>D.ASP.SLN</b><br>Lat. parabrachial nucl. |
|                   | <b>D</b> | <b>RASP</b>   | <b>D.RASP.NASP</b><br>CA3 LMR-Targeting   | <b>D.RASP.PSTUT</b>                | <b>D.RASP.PSWB</b>                       | <b>D.RASP.SLN</b>                           |
|                   | <b>D</b> | <b>TSTUT</b>  | <b>D.TSTUT.NASP</b>                       | <b>D.TSTUT.PSTUT</b>               | <b>D.TSTUT.PSWB</b>                      | <b>D.TSTUT.SLN</b><br>Striatal fast-spiking |
|                   | <b>D</b> | <b>TSWB</b>   | <b>D.TSWB.NASP</b><br>CA1 Axo-Axonic      | <b>D.TSWB.PSTUT</b>                | <b>D.TSWB.PSWB</b>                       | <b>D.TSWB.SLN</b>                           |

1195

|                   |                                 |                   |                        |
|-------------------|---------------------------------|-------------------|------------------------|
| <b>NASP</b>       | observed in hippocampal neurons | <b>TSWB.PSTUT</b> | improbable             |
| <b>D.PSWB</b>     | observed in other neurons       | —                 | impossible (no firing) |
| <b>D.ASP.NASP</b> | not found but possible          |                   |                        |

1196 **Box 1.** Examples of statistically significant correlations between firing patterns and  
1197 known molecular, morphological and electrophysiological properties in  
1198 hippocampal neurons

- 1) None of the 35 **glutamatergic** neuron types show persistent stuttering (**PSTUT**) ( $p=0.0083$ ). Moreover, none of the neurons with high input resistance ( $R_{in}$ ) display this steady state ( $p=0.0478$ ). Thus, all PSTUT cells are GABAergic interneurons with low or intermediate input resistance.
- 2) Neither any of the 63 **non-projecting** (local circuit) neurons nor any of the 55 **GABAergic** neuron types display transient slow-wave bursting (**TSWB**) ( $p=0.0214$  and  $p=0.0215$ , respectively). Moreover, no neuron type or subtype is found with both TSWB firing and high values of hyperpolarization-induced **sag** potential ( $p=0.035$ ). In other words, TSWB cells in the hippocampus are a subset of projecting (long-range) glutamatergic neurons with medium or low sags.
- 3) None of the 15 neuron types that express neuropeptide Y (**NPY**) become silent (**SLN**) after short firing discharge ( $p=0.0037$ ). In contrast, half of the 14 NPY-negative cells demonstrate this steady state.
- 4) All of the 10 neuron types that express cholecystinin (**CCK**) and the overwhelming majority of neuron types with high input resistance (17/18) display adapting spiking (**ASP**) ( $p=0.0113$ ). In contrast, this transient state is observed in just above half of CCK-negative cells (9/16) and two-thirds of cells with low or intermediate  $R_{in}$  (12/18).

5) Of 14 neuron type with **wide AP**, only one (EC LV-VI Pyramidal-Polymorphic) shows delayed (**D.**) firing ( $p=0.021$ ). In contrast, nearly half of neuron types without wide AP demonstrate this transient state.

6) With the exceptions of DG Semilunar Granule and CA1 O-LMR, none of the neurons with high threshold potential ( $V_{\text{thresh}}$ ) display transient stuttering (**TSTUT.**) ( $p=0.0481$ ); similarly, none of the neurons with high amplitude of fast afterhyperpolarization (**fAHP**), except CA1 Cajal-Retzius, demonstrate TSTUT. ( $p=0.0098$ ).

The p values are computed using Bernard's exact test for  $2 \times 2$  contingency tables (see *Materials and Methods*).

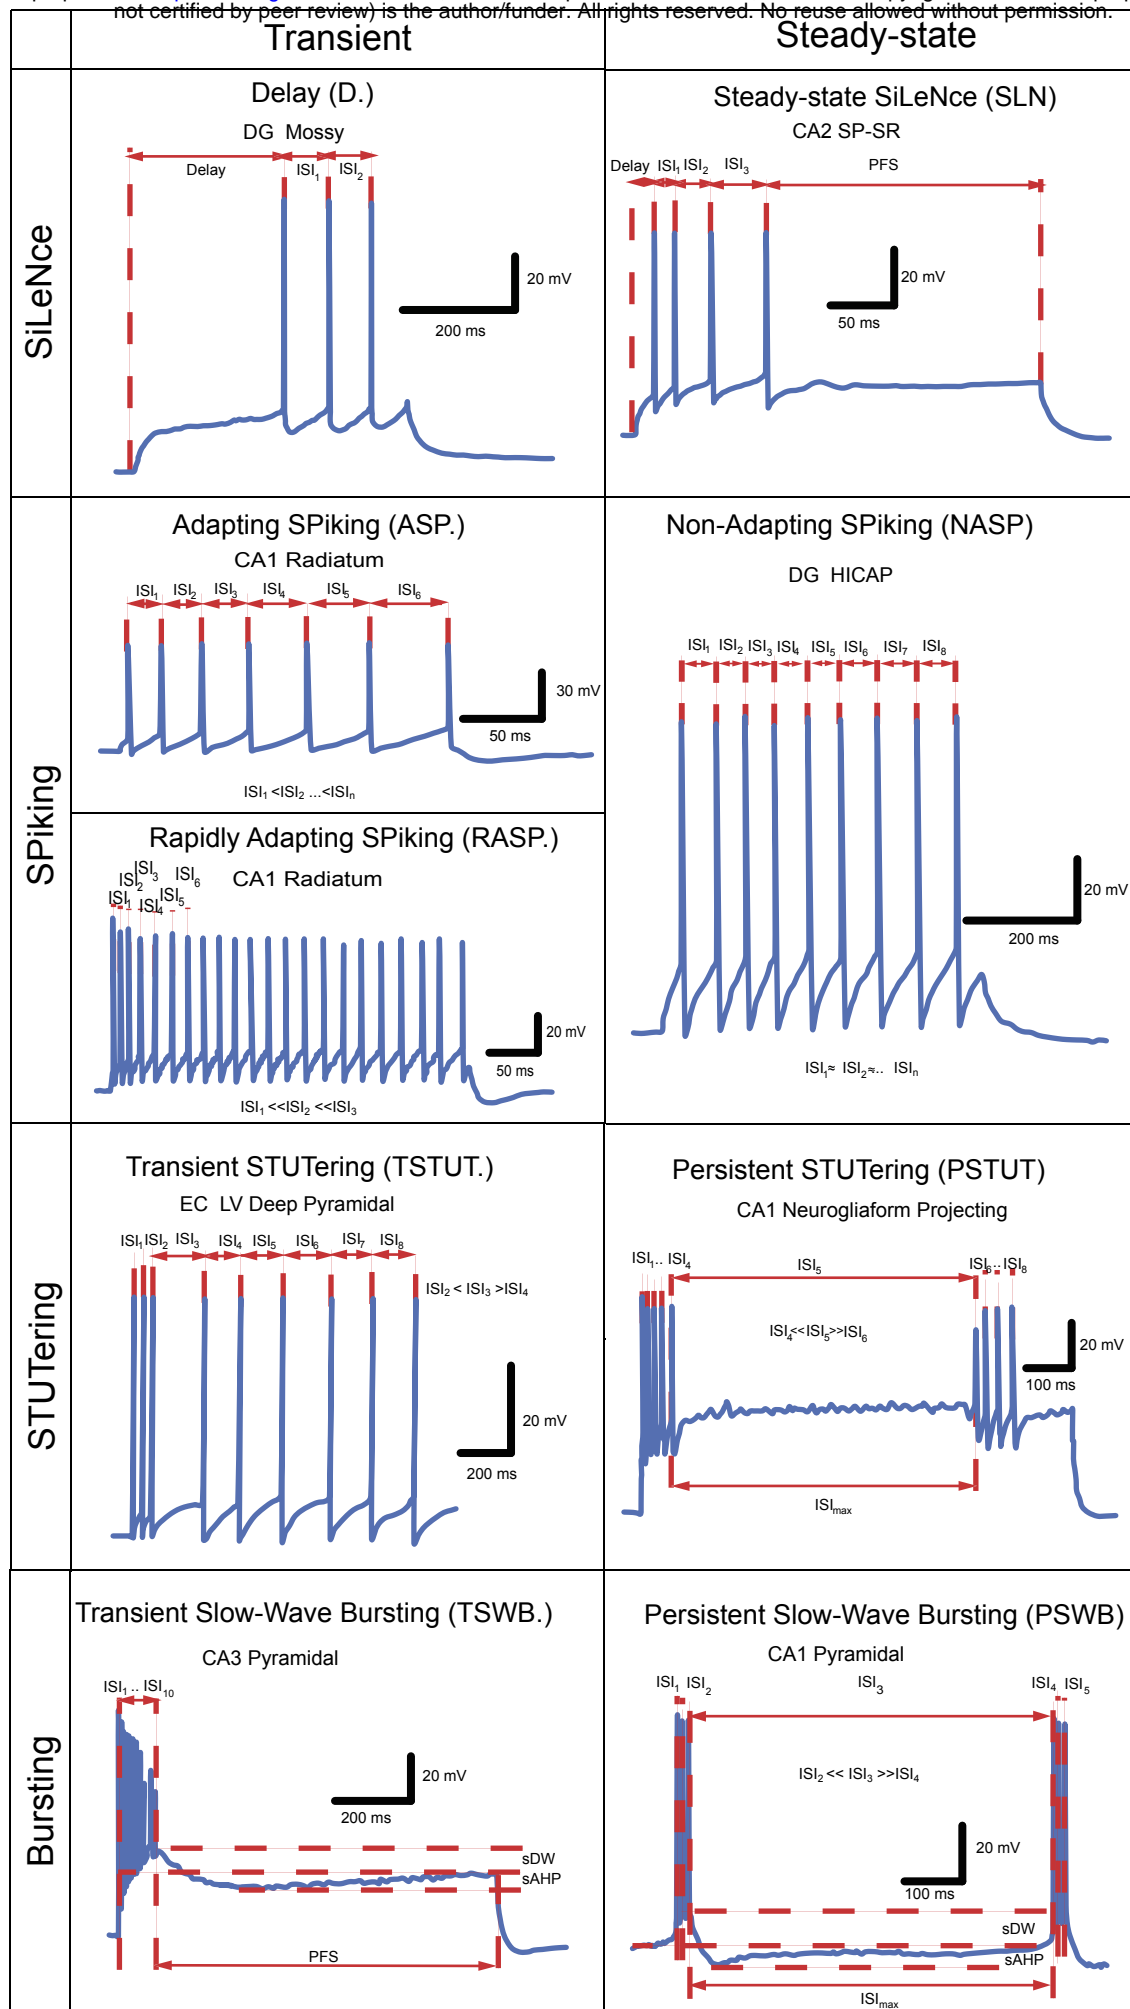

Figure 1

A

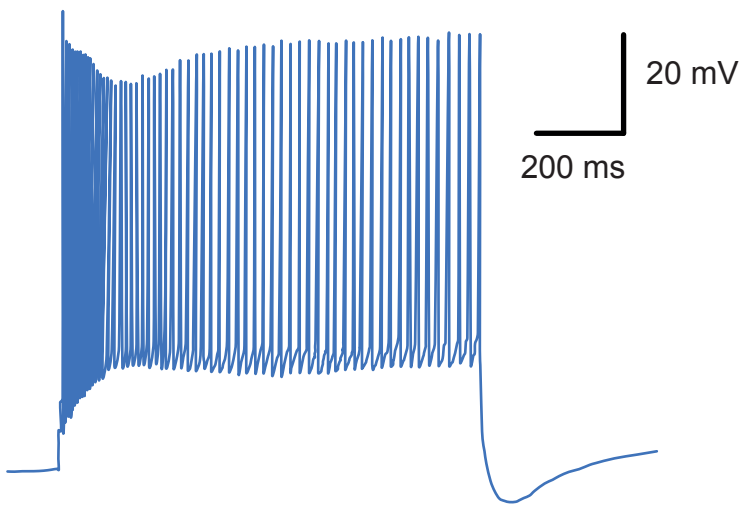

B

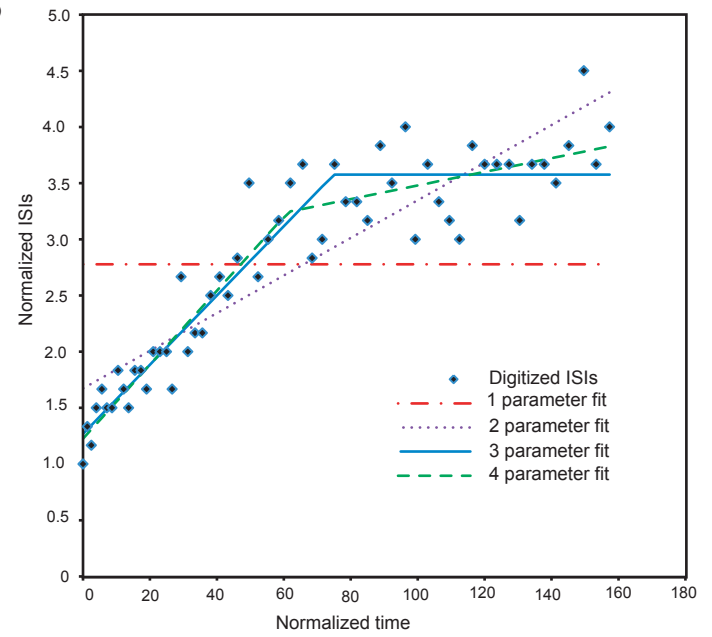

Figure 2

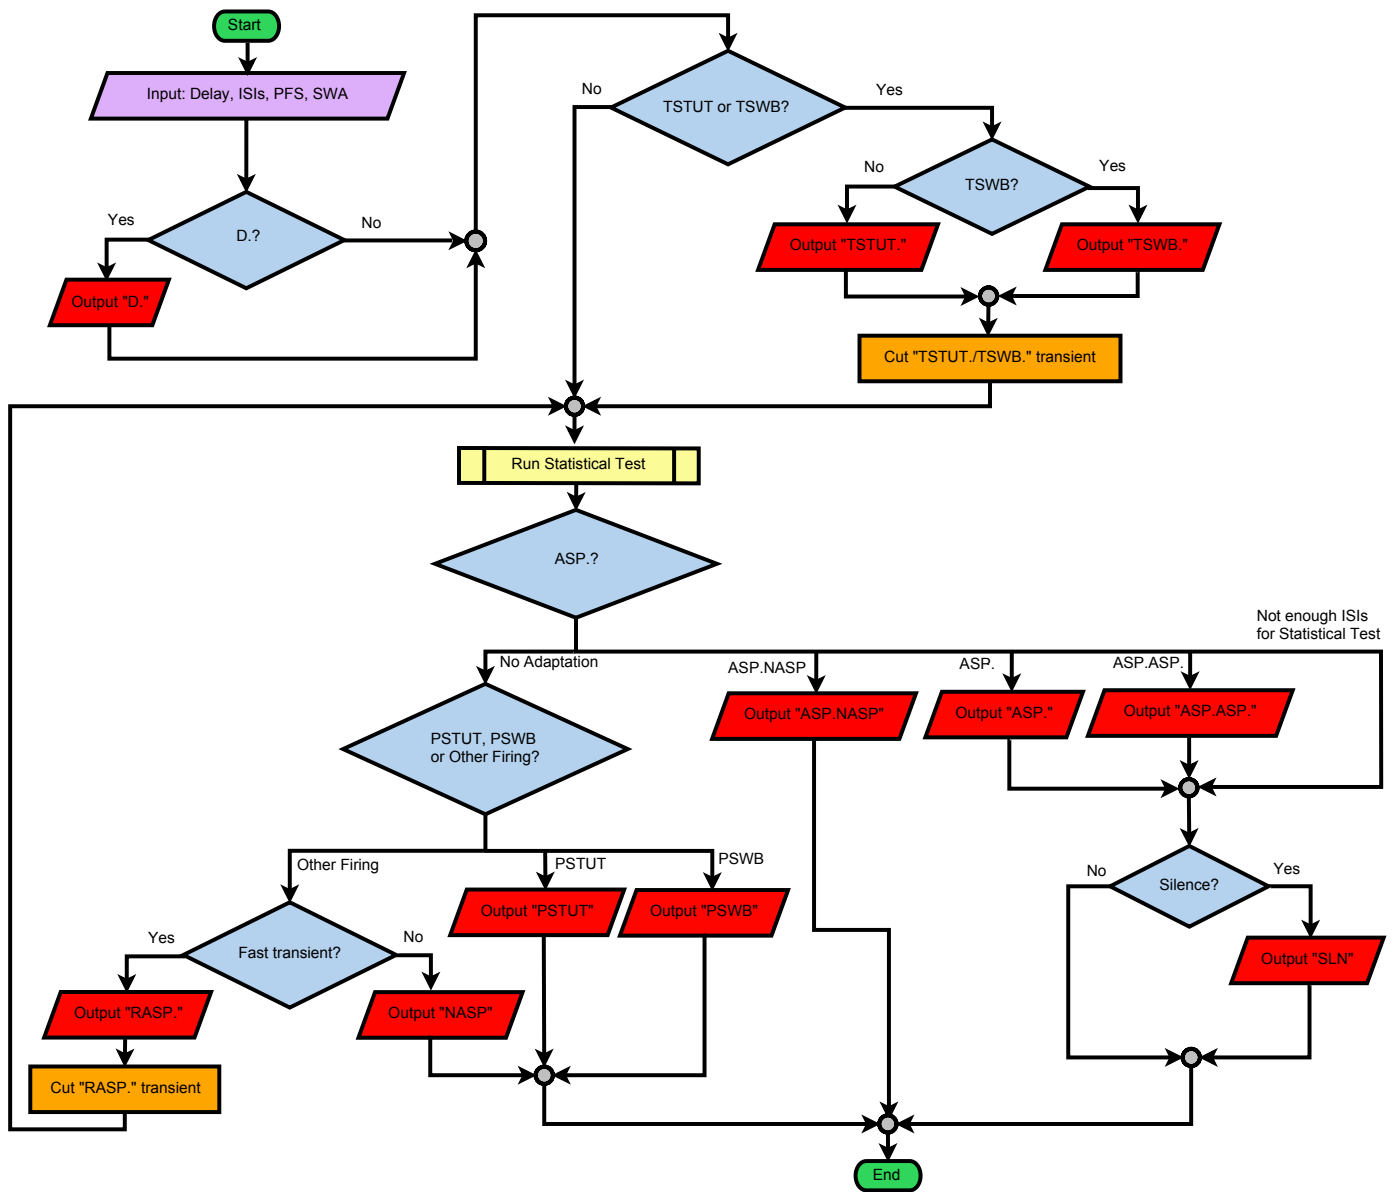

Figure 3

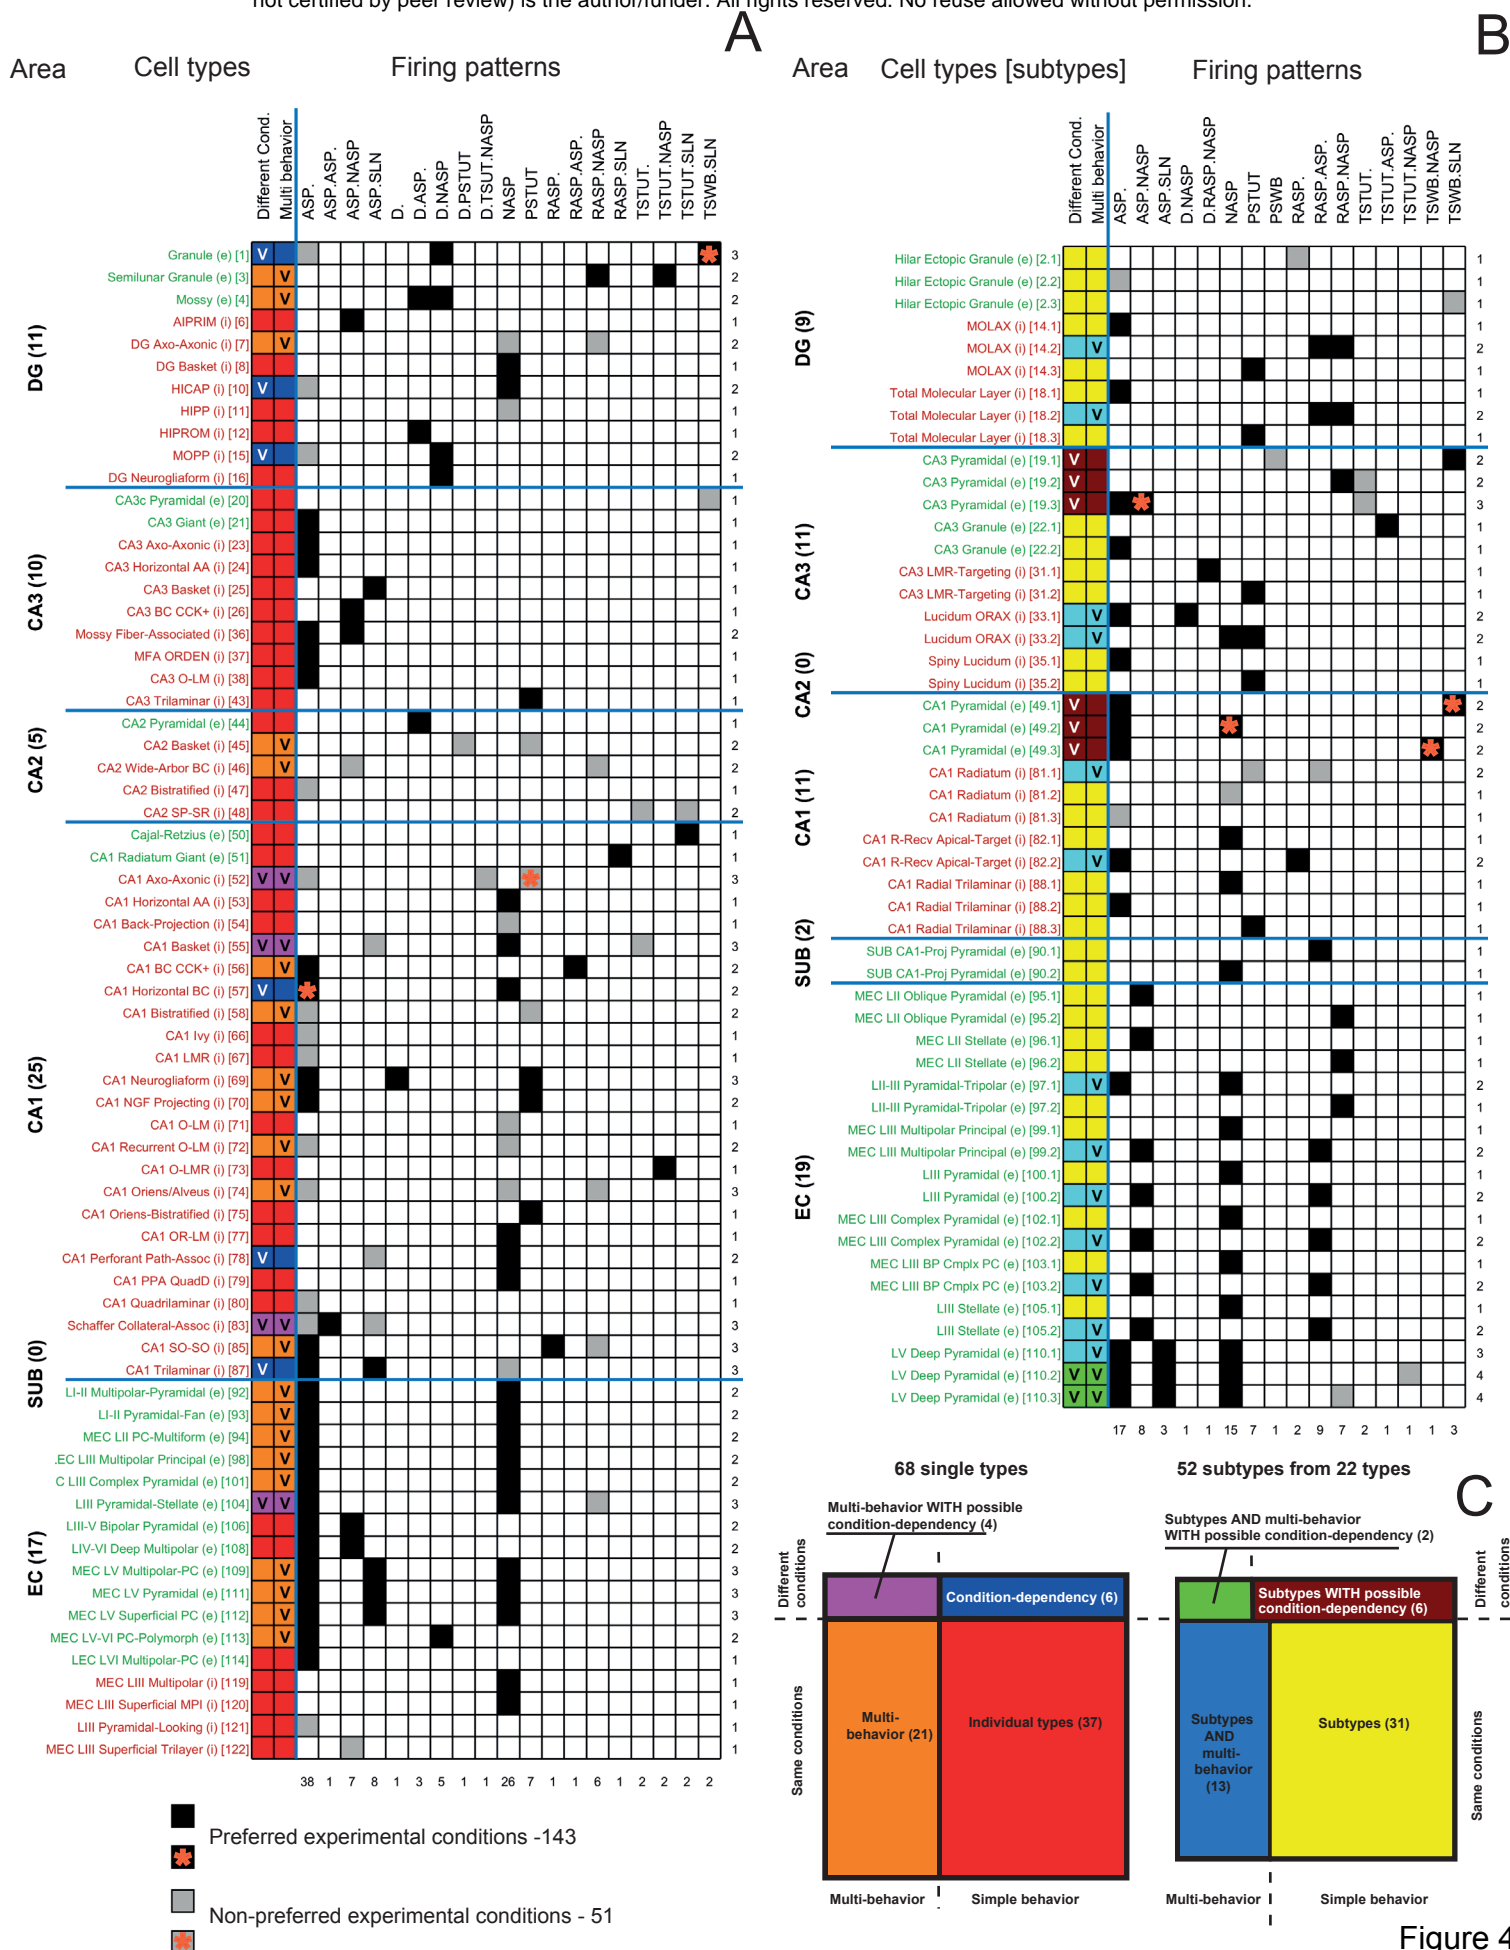

Figure 4



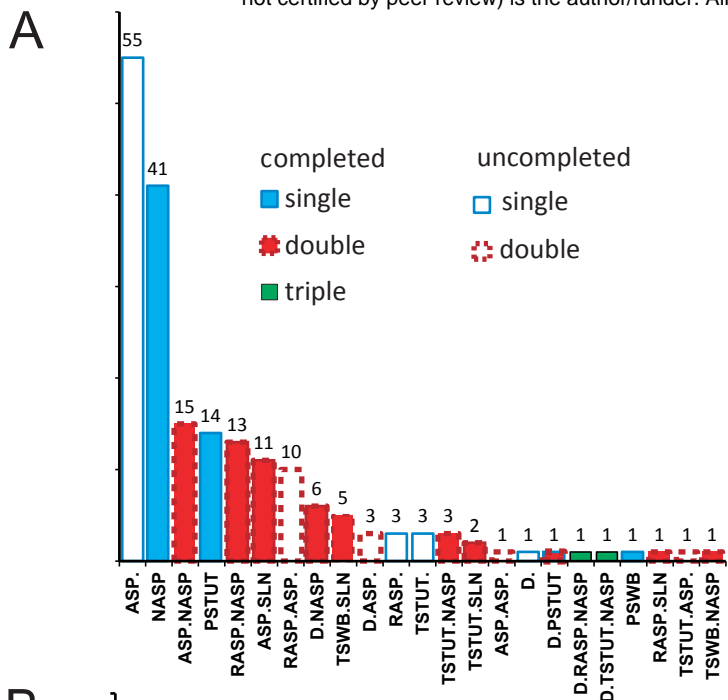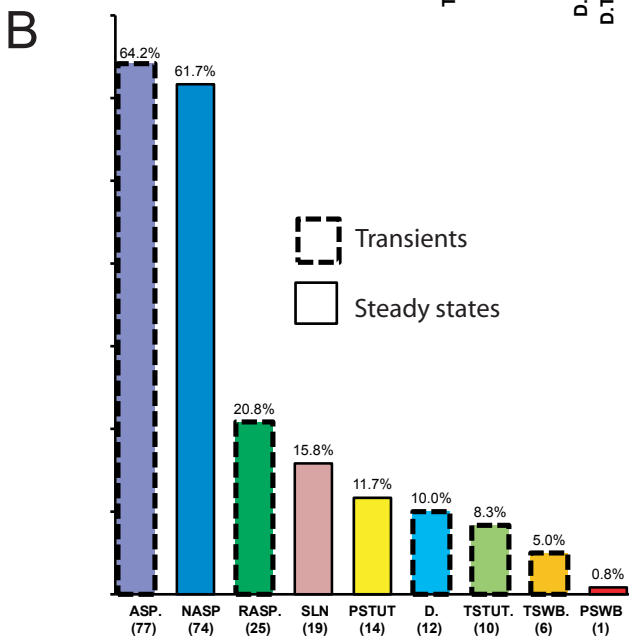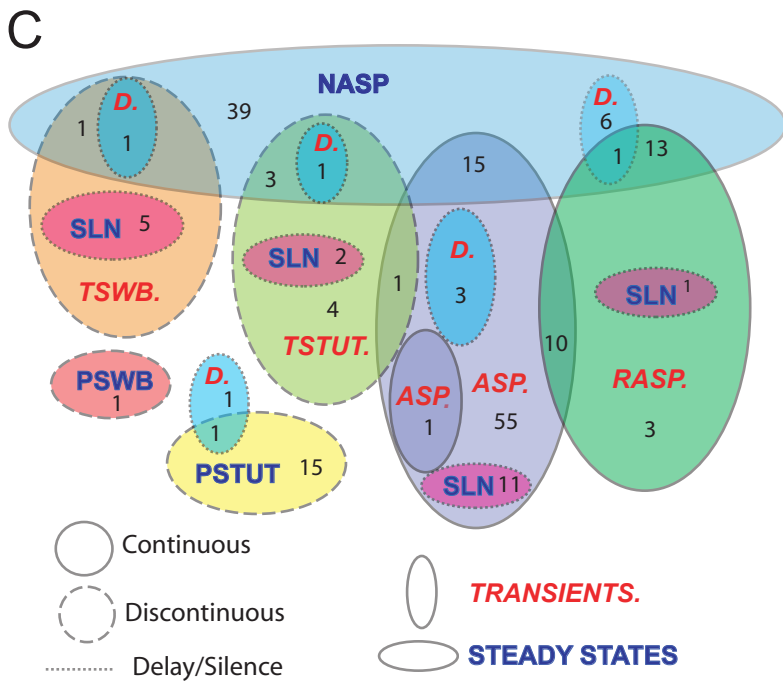

Figure 5

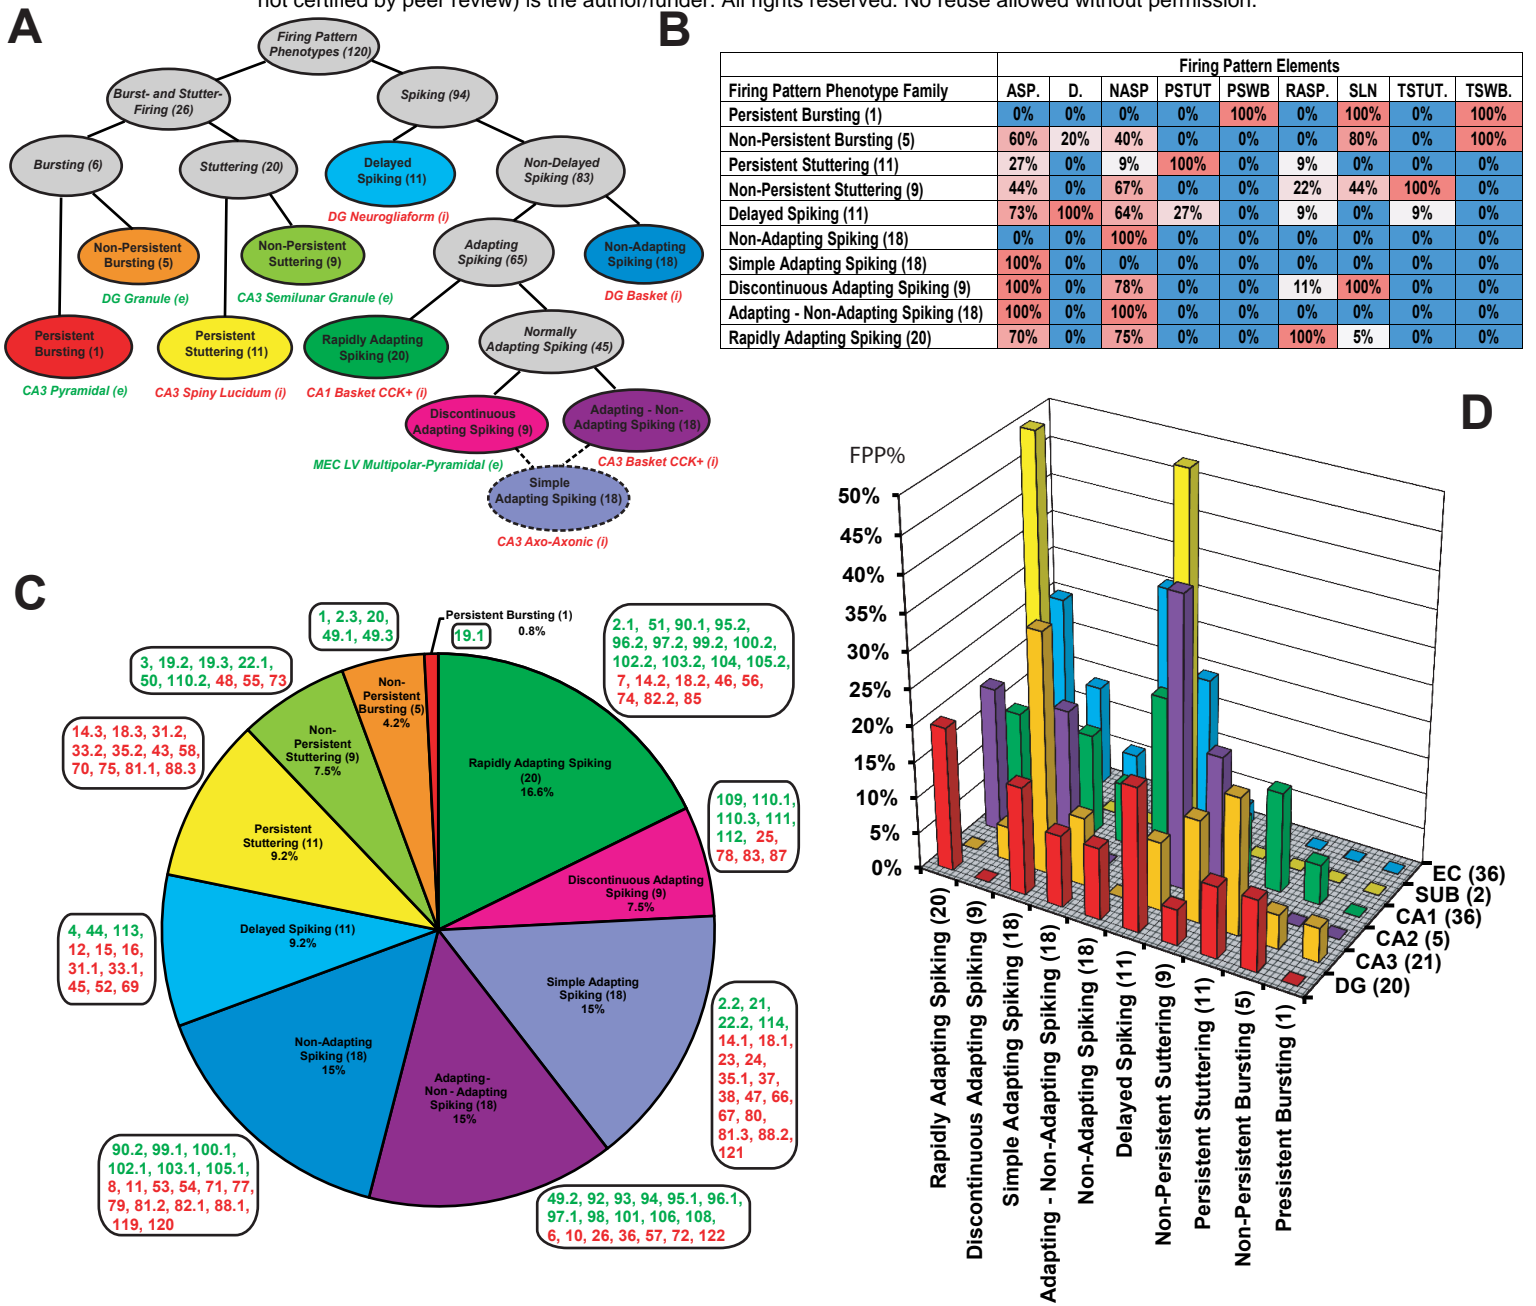

Figure 6

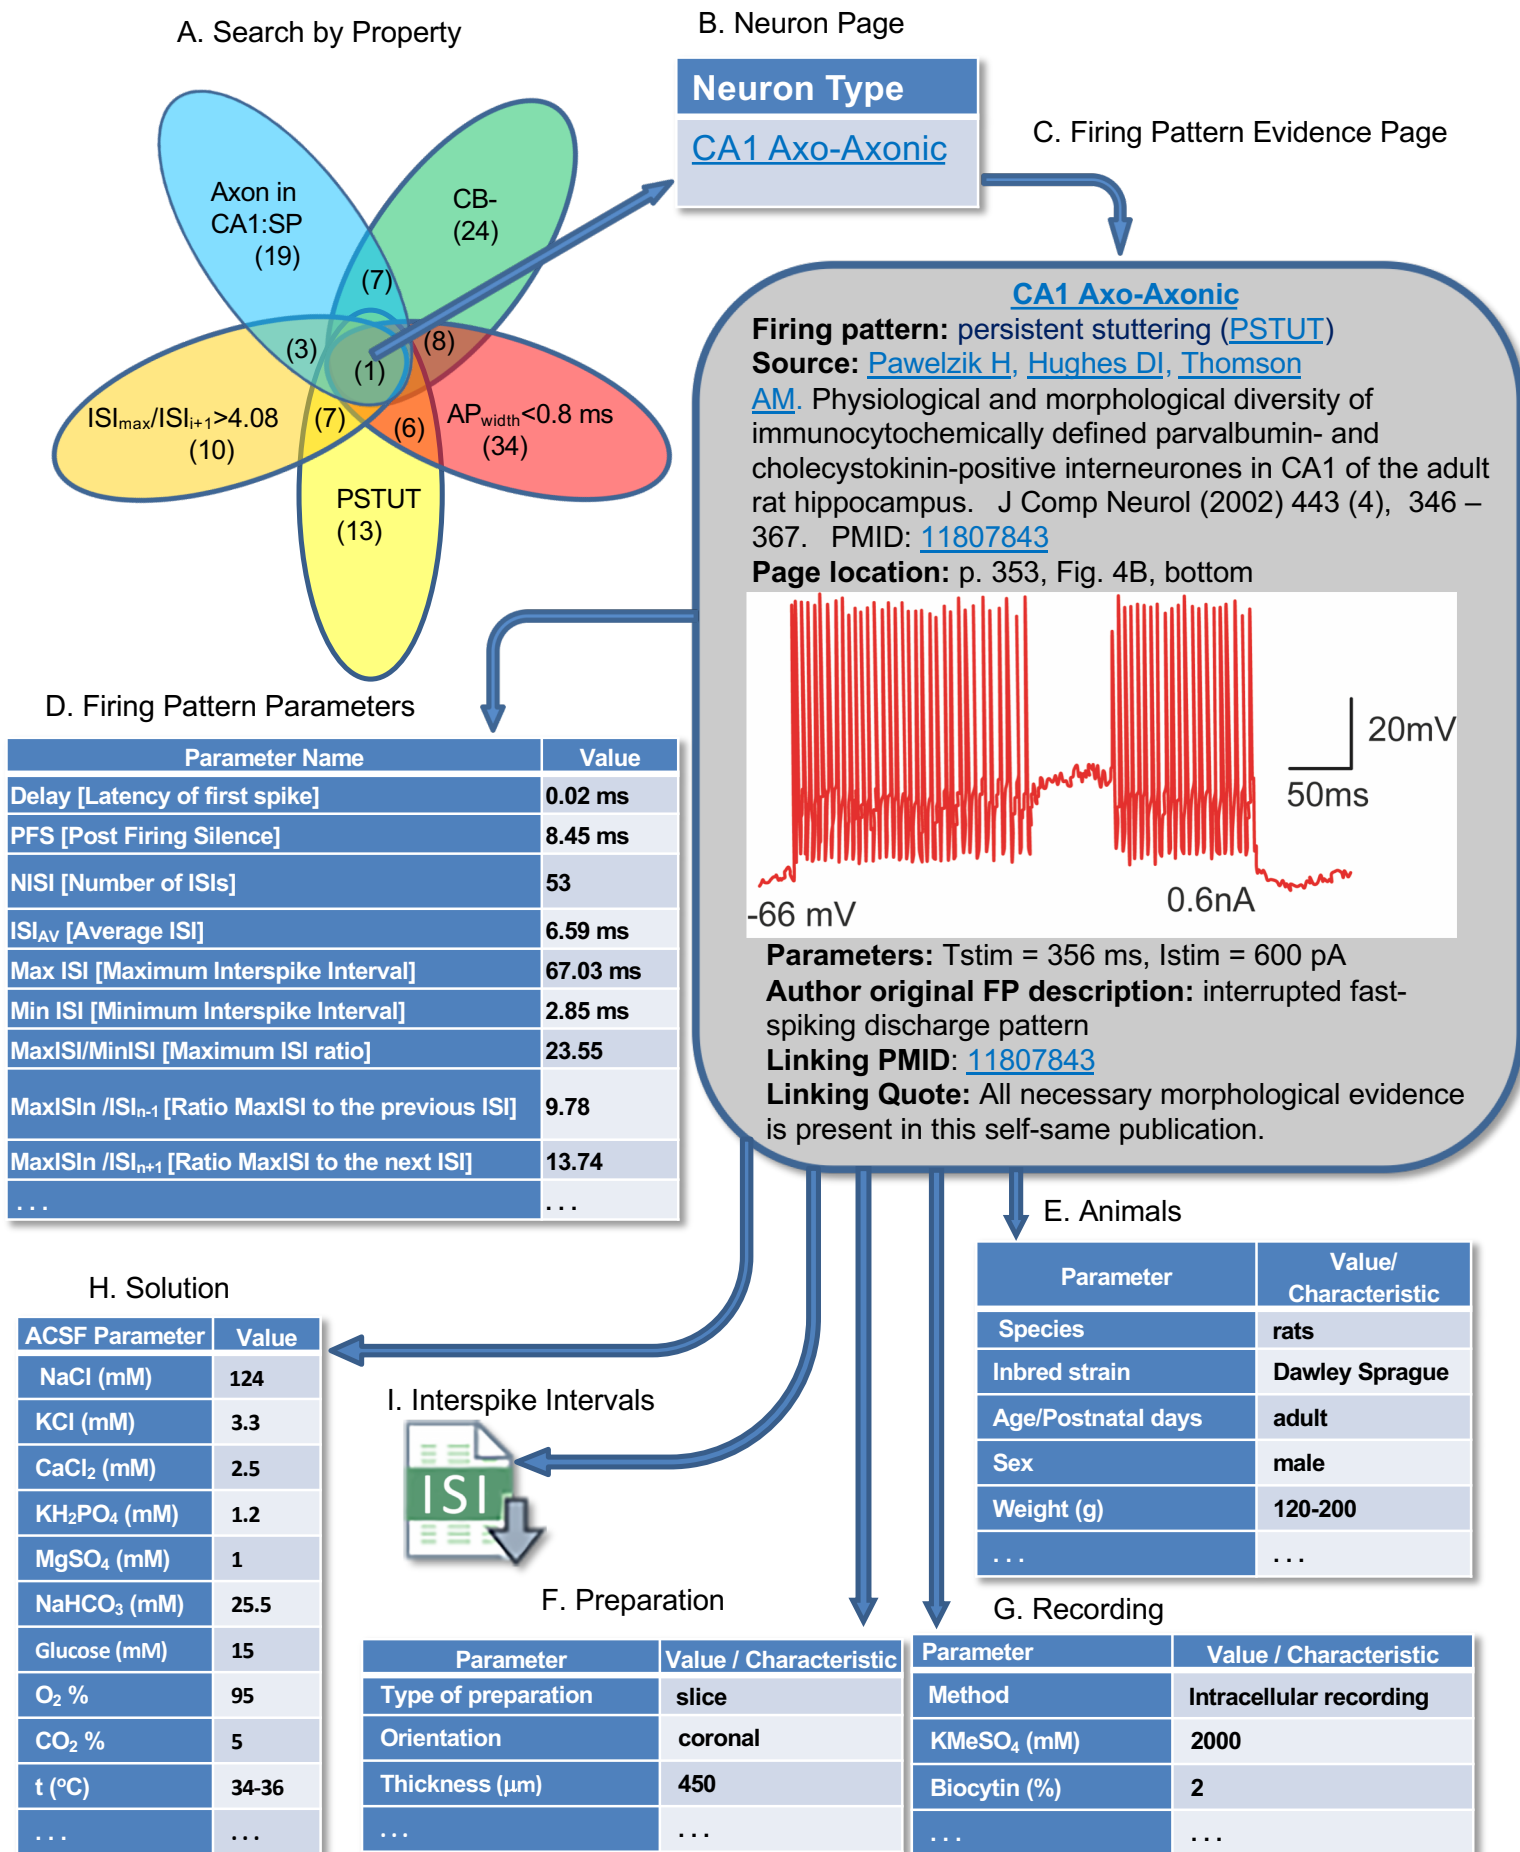

Figure 7

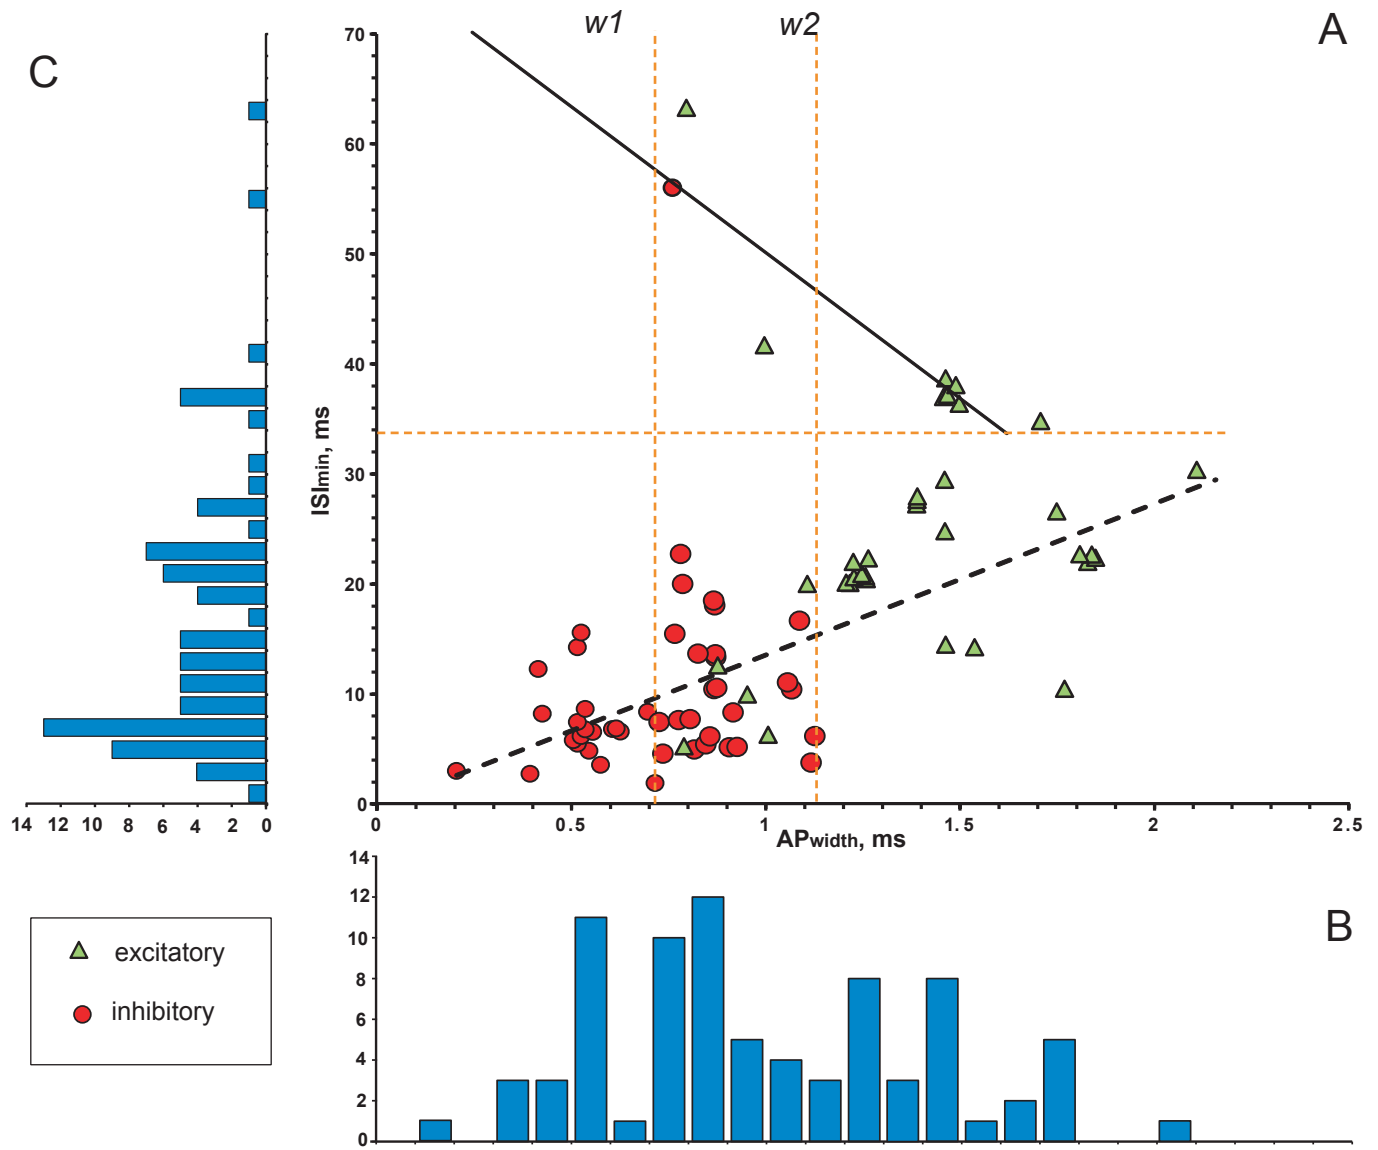

Source: https://www.biorxiv.org/content/biorxiv/early/2018/11/30/212084.full.pdf
